1 **Title: Anatomy of digital contact tracing: role of age,**  
2 **transmission setting, adoption and case detection**

3

4 **Short title: Anatomy of digital contact tracing**

5 Jesús A. Moreno López<sup>1,2</sup>, Beatriz Arregui García<sup>1,2</sup>, Piotr Bentkowski<sup>1</sup>, Livio Bioglio<sup>3</sup>,

6 Francesco Pinotti<sup>1</sup>, Pierre-Yves Boëlle<sup>1</sup>, Alain Barrat<sup>4,5</sup>, Vittoria Colizza<sup>1</sup>, Chiara Poletto<sup>1\*</sup>

7

8 <sup>1</sup>INSERM, Sorbonne Université, Pierre Louis Institute of Epidemiology and Public Health, Paris, France

9 <sup>2</sup>Instituto de Física Interdisciplinar y Sistemas Complejos IFISC (CSIC-UIB), Campus UIB, Palma de Mallorca,

10 Spain

11 <sup>3</sup>Department of Computer Science, University of Turin, Turin, Italy

12 <sup>4</sup>Aix Marseille Univ, Université de Toulon, CNRS, CPT, Turing Center for Living Systems, Marseille, France

13 <sup>5</sup>Tokyo Tech World Research Hub Initiative (WRHI), Tokyo Institute of Technology, Tokyo, Japan

14 \*[chiara.poletto@inserm.fr](mailto:chiara.poletto@inserm.fr)

15

16

17

18

## 19 **Abstract**

20 The efficacy of digital contact tracing against COVID-19 epidemic is debated: smartphone  
21 penetration is limited in many countries, non-uniform across age groups, with low coverage  
22 among elderly, the most vulnerable to SARS-CoV-2. We developed an agent-based model to  
23 precise the impact of digital contact tracing and household isolation on COVID-19  
24 transmission. The model, calibrated on French population, integrates demographic, contact-  
25 survey and epidemiological information to describe the risk factors for exposure and  
26 transmission of COVID-19. We explored realistic levels of case detection, app adoption,  
27 population immunity and transmissibility. Assuming a reproductive ratio  $R = 2.6$  and 50%  
28 detection of clinical cases, a ~20% app adoption reduces peak incidence by ~35%. With  $R =$   
29 1.7, >30% app adoption lowers the epidemic to manageable levels. Higher coverage among  
30 adults, playing a central role in COVID-19 transmission, yields an indirect benefit for elderly.  
31 These results may inform the inclusion of digital contact tracing within a COVID-19 response  
32 plan.

## 33 **Introduction**

34 Intervention measures aiming at preventing transmission have been key to control the first  
35 wave of the COVID-19 pandemic. Many countries have adopted lockdown and strong social  
36 distancing during periods of intense epidemic activity to suppress the epidemic and reduce  
37 hospital occupancy below saturation levels (1, 2). Due to their huge economic and societal  
38 costs these interventions can only be implemented for a limited amount of time. The building  
39 of population immunity has been slow (3–5), so that new waves are possible after temporary  
40 lockdowns and lifting of restrictions. Sustainable strategies are required to maintain the  
41 epidemic under control while enabling the close-to-normal functioning of the society.  
42 Widespread testing, case finding and isolation, contact-tracing, use of face masks and  
43 enhanced hygiene are believed to be crucial components of these strategies.

44 Contact-tracing aims to avoid transmission by isolating at an early stage only those  
45 individuals who are infectious or potentially infectious, in order to minimize the societal costs  
46 associated to isolation. Considerable resources are therefore directed at improving  
47 surveillance capacities to allow efficient and rapid investigation and isolation of cases and  
48 their contacts. To enhance tracing capacities, the use of digital technologies has been  
49 proposed, leveraging the wide-spread use of smartphones. Therefore, proximity-sensing  
50 applications have been designed and made available – e.g. in Australia, France, Germany,  
51 Iceland, Italy, Switzerland – to automatically trace contacts, notify users about potential  
52 exposure to COVID-19 and invite them to isolate.

53 Empirical studies of the impact of these digital applications are however limited (6–8), and  
54 the utility of this intervention is debated. Some built-in features make it more efficient than  
55 manual contact tracing: it is automated, reducing the burden of manual contact tracing and  
56 limiting recall bias; it is faster, as information can be transmitted in real time. However,  
57 coverage is uneven. In particular, most children and elderly do not own a smartphone or are  
58 less familiar with digital technologies. The overall adoption of the app among smartphone  
59 owners will also be a limiting factor, as well as the fraction of cases actually triggering the  
60 alert to the contacts and the adherence to isolation of the app adopters who receive an alert.

61 These variables must be gauged in light of the risk factors for exposure and transmission  
62 driving the COVID-19 epidemic. First, individuals of different age contribute differently to the  
63 transmission dynamics of COVID-19. Younger individuals tend to have more contacts than  
64 adults or the elderly. On the other hand, a marked feature of COVID-19 is the strong age  
65 imbalance among cases (9–13), that may be explained by both a reduced susceptibility (9,  
66 10) and an increased rate of subclinical infections in children compared to adults (10, 11, 13).  
67 As subclinical cases are harder to detect, this implies that identification of cases and of their  
68 contacts may be dependent on age. Second, SARS-CoV-2 transmission risk varies  
69 substantially by setting. Transmissions were registered predominantly in households, in  
70 specific workplaces and in the community (linked to shopping centers, meals, parties, sport

71 classes, etc.) (14, 15). This is due, at least in part, to the higher risk of contagion of crowded  
72 and indoor environments (14–16). Notably, contacts occurring in the community are also the  
73 ones more affected by recall biases, thus more difficult to trace with manual contact tracing.

74 Several modelling studies have quantified the impact of contact tracing (17–26), with some of  
75 them addressing specific aspects of digital contact tracing (18–23). Still the interplay between  
76 age and setting heterogeneity in determining the efficacy of this intervention is largely  
77 unexplored. Here we provide a systematic exploration of the different variables at play. We  
78 considered France as a case study and integrated different sources of data to realistically  
79 describe the French population, in terms of its demography and social contact behavior. We  
80 accounted for the dynamics of contacts according to age and setting, and for the setting-  
81 specific risk of transmission. We used COVID-19 epidemiological characteristics for  
82 parametrization. We then modelled case detection and quarantining, isolation of their  
83 household contacts and digital contact tracing, under different hypotheses of potential  
84 reduction in transmissibility due to other effects (e.g. face-masks and increased hygiene). We  
85 quantified the impact of digital contact tracing on the whole population and on different  
86 population groups and settings, as a function of several variables such as the rate of app  
87 adoption, the probability of detection of clinical and subclinical cases, population immunity,  
88 compliance to isolation and transmission potential. Our results provide quantitative  
89 information regarding the impact of digital contact tracing within a broader response plan.

## 90 **Results**

### 91 **Dynamic multi-setting contact network**

92 We modelled the French population integrating available demographic and social-contact  
93 data. We collected population statistics on age, household size and composition (Figure 1 A,  
94 B), workplace and school size, smartphone penetration (Figure 1 E), and commuting fluxes.  
95 Then, by following standard approaches in the literature (27, 28) individuals were created in-  
96 silico with a given age and assigned to a municipality, a household, and a workplace/school

97 according to the statistics. Smartphones were assigned to individuals depending on their age  
98 according to available statistics on French users (Figure 1 E) (29). Overall smartphone  
99 penetration was 64%, that represents the upper bound limit of app adoption in the population  
100 – reached when 100% of individuals owning a smartphone download the app. This synthetic  
101 population reproduced the location statistics of individuals in different settings, yielding the  
102 basis of a multi-setting network of daily face-to-face contacts in household, school,  
103 workplace, community and transport (Figure 1 H) (30–32). We parametrized the network  
104 from a social contact survey providing information on contacts by age and setting (33)  
105 (Figure 1 C, D). As contacts may occur repeatedly, we associated an activation rate to each  
106 contact and sampled each day contacts based on their activation rate (Figure 1 G). We  
107 imposed that 35% of the contacts registered during one day occur with daily frequency, as  
108 found in (33). Figure 1 F and I show that the features of the resulting daily contact network  
109 matched the data: the distribution of the number of contacts was right-skewed as the  
110 empirical one reported in (33) and the contact matrix showed age assortativity and the  
111 characteristic parent-children (off-diagonal) contact pattern. As a case study we restricted our  
112 study to a municipality with a population size of ~100,000 individuals (see Material and  
113 Methods and Supplementary Material for additional details).

## 114 **COVID-19 epidemic dynamics**

115 We modelled coronavirus transmission and outcome as shown in Figure 2 A, B. Individuals  
116 could be susceptible,  $S$ , exposed,  $E$ , pre-symptomatic preceding subclinical infection,  $I_{p,sc}$ ,  
117 pre-symptomatic preceding clinical infection,  $I_{p,c}$ , subclinically infectious,  $I_{sc}$ , clinically  
118 infectious,  $I_c$ , and recovered,  $R$ . Subclinical cases had symptoms that ranged from no  
119 symptoms to mild and continued their normal activity throughout the infectious period.  
120 Clinical cases had moderate to critical symptoms and stayed at home after the onset of  
121 symptoms (11, 13) – we did not consider hospitalization. Individuals in compartments  $I_{p,sc}$ ,  
122  $I_{p,c}$ ,  $I_{sc}$ ,  $I_c$  transmitted the infection, with subclinical individuals characterized by a lower risk  
123 of transmission than clinical ones (see Material and Methods). We accounted for the

124 heterogeneous susceptibility and clinical manifestation by age as parametrized from (9, 13)  
125 (Table 1). In order to parametrize the infection's natural history, we combined evidence from  
126 epidemiological and viral shedding studies. We used 5.2 days for the incubation period (34),  
127 2.3 days for the average length of the pre-symptomatic phase (35), and 7 days on average  
128 for the infectivity period after symptoms' onset (35).

129 We first simulated an uncontrolled epidemic assuming transmission levels corresponding to  
130  $R_0 = 3.1$ , within the range of values estimated for COVID-19 in France at the early stage of  
131 the pandemic (1, 36). The generation time resulting from our model and parameters had  
132 mean value of 6.0 days (95% CI [2,17]), in agreement with epidemiological estimates (11, 35,  
133 37). Figure 2 C and D show the repartition of cases among age groups and settings at the  
134 early stage and during the whole course of the epidemic. Age-specific infection probability  
135 was higher among young adults, while clinical infections were shifted towards older  
136 population with respect to the overall (clinical and subclinical) cases, as noted in previous  
137 observational and modelling works (10). The age profile changed in time with children  
138 infected later as the epidemic unfolded (10, 38). Transmissions occurred predominantly in  
139 household and workplaces followed by the community setting (14).

## 140 **Contact tracing**

141 We quantified the impact of combined household isolation and digital contact tracing  
142 considering the possible scenario of a new epidemic wave emerging after the release of strict  
143 lockdown measures in the country. We thus assumed some level of immunity to the virus –  
144 exploring a range from 0 to 15% of the population. We considered interventions based on the  
145 use of digital contact tracing, coupled with testing and isolation of clinical cases and  
146 households. 50% of individuals with clinical symptoms were assumed to get tested after  
147 consulting a doctor and to isolate if positive. Higher and lower percentages were also  
148 considered.

149 Case tracing was assumed to start when a case with clinical symptoms tested positive and  
150 was isolated, with an average delay of ~1 day. Household members were also invited to  
151 isolate – we assumed that 90% of them accepted to isolate and that their isolation occurred  
152 at the same time as the detected case. If the index case had the app installed, the contacts  
153 he/she registered in the previous  $D = 7$  days were notified and could decide to isolate with a  
154 compliance probability of 90% – lower values of compliance were also explored. Note that  
155 only contacts occurring between individuals who both use the app can be registered, so only  
156 app adopters can be notified. We explored several levels of app adoption in the population.  
157 In addition to the detection of clinical cases, we assumed that a proportion of subclinical  
158 cases was also identified. These may be cases with very mild, unspecific symptoms who  
159 decided to get tested as part of vulnerable groups (i.e. co-morbidity) or because highly  
160 exposed to the infection (health care professionals). We hypothesized this proportion to be  
161 small in the baseline scenario (5%), and we later varied it up to 45%. Isolated individuals  
162 resumed normal daily life if infection was not confirmed. We took 7 days as the time needed  
163 for being confirmed negative because multiple tests and some delay since the exposure are  
164 needed for a negative result to be reliable. Infected individuals got out of quarantine after 14  
165 days unless they still have clinical symptoms after the time is passed. They may, however,  
166 decide to drop out from isolation each day with a probability of 2% if they don't have  
167 symptoms (21, 26).

168 Figure 3 summarizes the effect of the interventions. We compared the uncontrolled scenario  
169 ( $R = R_0 = 3.1$ ) with scenarios where the transmissibility is reduced due to the adoption of  
170 barrier measures ( $R$  down to 1.5). We also assumed 10% of the population to be immune to  
171 the infection (36). Panels A-C shows the results for  $R = 2.6$  and  $R = 1.7$ . With  $R = 2.6$  (Figure  
172 3 A, C), the relative reduction of peak incidence due to household isolation only would be  
173 27%. The inclusion of digital contact tracing would increase the relative reduction to 35% with  
174 ~20% app adoption, and to 66% with ~60% app adoption – i.e., 90% of individuals owning a  
175 smartphone use the app. This corresponds to an additional mitigation effect ranging from

176 30% to 144% provided by contact tracing compared to household isolation only. With  $R = 1.7$   
177 (Figure 3 B, C), we find that ~20% app adoption would reduce the peak incidence by 45%  
178 (additional mitigation effect of 25%), while the reduction would reach 89% in a scenario of  
179 ~60% app adoption (additional mitigation effect of 147%). According to the projections in  
180 Ref.(1), intensive care units occupation would remain below the saturation level with  
181 incidence below 0.4 /1000 hab. In the scenario with  $R = 1.7$ , this would be reached with app  
182 adoption greater than ~30% (grey dashed line in Figure 3 B). Stronger reductions could be  
183 obtained with more efficient detection of clinical cases (Figure 3 E, H, obtained with  $R = 2.6$ )  
184 and of subclinical ones (Figure 3 L,  $R = 2.6$ ). The relative reduction in peak incidence  
185 produced by ~20% app adoption would be 47% with an 80% detection rate of clinical cases,  
186 compared to the 35% relative reduction obtained with 50% detection rate. Results show  
187 similar trends across different levels of population immunity, with higher relative impacts  
188 predicted for low immunity (Figure 3 F, I,  $R = 2.6$ ). Compliance to isolation of household  
189 contacts had an appreciable effect at low app adoption (Figure 3 K,  $R = 2.6$ ). 50%  
190 compliance would reduce peak incidence of 19%, compared to 27% reduction for 90%  
191 compliance, in the case of household isolation only. Compliance of notified contacts to  
192 isolation, instead, has a larger effect on peak incidence only when app adoption is high, as  
193 expected. For example, if the app was adopted by 60% of individuals the reduction in peak  
194 incidence would pass from 55% to 66% if compliance changed from 50% to 90% (Figure 3 J,  
195  $R = 2.6$ ).

196 We analyzed the simulation outputs to characterize index cases and their contacts and relate  
197 this to the reduction in number of cases by age and setting. We found that adults  
198 represented the majority of index cases (Figure 4 D), while their household contacts were  
199 mostly children. The app registered mostly contacts with adults, and the tracked contacts  
200 were occurring predominantly in workplaces and in the community (Figure 4 A). This results  
201 in a heterogenous reduction in transmission ( $TRR$ ) by setting and age group. Household  
202 isolation reduced transmission in all settings, with the smallest effect in workplaces (Figure 4



203 B). Digital contact tracing has instead a high *TRR* at work, in the community and in transports  
204 (Figure 4 C). Household isolation reached mostly children (< 15 years old) and the elderly  
205 (especially the 75+ group) with the smallest effect in the 15-59 years old (Figure 4 E).  
206 Adopting digital contact tracing led to an increased *TRR* with age, even among the oldest  
207 age range (Figure 4 F). This result shows the indirect effect of digital tracing: due to the  
208 central role of adults in the transmission of SARS-CoV-2 towards all age-groups, avoiding  
209 adult infections led to less transmission to the elderly. We also tested the case in which  
210 elderly people (70+) owning a smartphone did not install the app at all, assuming they are  
211 less familiar with digital technologies, and we found no appreciable effect. These results and  
212 additional details are provided in the Supplementary Material.

### 213 **Traced and Isolated individuals**

214 Feasibility of contact tracing depends on the number of traced contacts who require  
215 assistance and virological tests. In a scenario with high detection rate (80%), we found that  
216 for each detected case 1.5 contacts were identified on average through household isolation  
217 but up to 7.5 with app adoption at 57%, for  $R = 2.6$  and 10 for  $R = 1.7$  (Figure 5 D). This  
218 number was however subject to fluctuations (Figure 5 A). Overall, the maximal fraction of the  
219 population quarantined at any given time was ~50 per 1000 habitants in a scenario with  $R =$   
220 2.6, and was between ~1 and ~4.5 per 1000 habitants when  $R = 1.7$  (Figure 5 B and E). The  
221 latter case corresponded to the situation in which high levels of app adoption were able to  
222 strongly reduce spreading, thus the proportion of isolated individuals declined in time,  
223 signaling the success of quarantining in preventing the propagation of the infection. A total of  
224 30 per 1000 habitants were isolated in a scenario with  $R = 1.7$ , assuming high app adoption.  
225 At  $R = 2.6$ , 1030 per 1000 habitants were isolated at the end of the epidemic meaning that  
226 certain individuals were isolated more than once. In all scenarios, the increase of app  
227 adoption inevitably determined an increase in the proportion of people that were  
228 unnecessarily isolated, i.e. of individuals that were not infected but still isolated (Figure 5C,  
229 F): this proportion increased from 61% to 84% with the increase of app adoption from 0% to

230 57% (note that the case of 0% app adoption implies that 61% of individuals who were  
231 isolated through household isolation were not infected). These numbers were similar for the  
232 two tested values of  $R = 1.7$  and  $2.6$  (Figure 5 C and F).

## 233 Discussion

234 Quantifying the impact of digital contact tracing is essential to envision this strategy within a  
235 wider response plan against the COVID-19 epidemic. We modelled this intervention together  
236 with household isolation assuming a 50% detection of clinical cases. In a scenario of high  
237 transmissibility ( $R = 2.6$ ), we found that household isolation by itself would produce a  
238 reduction in peak incidence of 27%, while the inclusion of digital contact tracing could  
239 increase this effect by 30% for a reasonably achievable app adoption (~20% of the  
240 population), and by 144% for a large-scale app adoption (~60%). At a moderate  
241 transmissibility level ( $R = 1.7$ ), the app would substantially damp transmission (36% to 89%  
242 peak incidence reduction for increasing app adoption), bringing the epidemic to manageable  
243 levels if adopted by 32% of the population or more. Importantly, the app-based tracing and  
244 household isolation have different effects across settings, the first intervention efficiently  
245 preventing transmissions at work that are not well targeted by the second. Moreover, app-  
246 based contact tracing also yields a protection for the elderly despite the lower penetration of  
247 smartphones in this age category.

248 Lockdown and social distancing have been effective in reducing transmission in the first  
249 epidemic wave in many countries. However, their huge societal and economic costs made  
250 their prolonged implementation impossible. Phasing out lockdown occurred at the beginning  
251 of the summer in Europe, with high temperatures, increased ventilation and outdoor activities  
252 helping reducing the risk of contagion (16). The relaxation of almost all restrictive measures,  
253 the start of activities in the fall and the cold season accelerated transmission, reaching a  
254 point in which strict non-pharmaceutical interventions were again necessary to curb the  
255 epidemic increase. At the time of writing, national or local lockdowns were restored in several

256 countries in Europe (39). This highlights the need for exit strategies based on sustainable  
257 non-pharmaceutical interventions, able to suppress COVID-19 spread while having limited  
258 impact on the economy and on individuals' daily life (1).

259 Many countries have increased their capacity to detect cases and track their contacts. In  
260 France, thousands of transmission clusters have been identified and controlled since the end  
261 of the first lockdown period (40). Under-detection of cases was however estimated over  
262 summer, and the system was predicted to deteriorate rapidly for increasing epidemic activity  
263 (41). The automated tracking of contacts could then provide an important complementary  
264 tool. Here we found that digital contact tracing could reduce attack rate and peak incidence,  
265 in agreement with previous works (18, 19, 26). The impact of the measure would depend on  
266 population immunity, thus geographical heterogeneities should be expected, as regions were  
267 differentially hit by the first wave of the epidemic (4). On the other hand, app adoption as well  
268 may be higher in these areas because of risk aversion behavior (42). Also, higher  
269 participation rates may be expected in dense urban areas to protect from exposure from  
270 random encounters (e.g. in public transports).

271 Under realistic hypotheses, the intervention would not be able alone to bring the epidemic  
272 under control in a scenario where transmission is high (18, 19, 26), mainly due to the strong  
273 role of asymptomatic transmission in fueling the epidemic (11, 12, 43). We explored different  
274 values of the reproductive number  $R$ , to effectively account for non-pharmaceutical measures  
275 mitigating the epidemic and for the adoption of preventive measures substantially hindering  
276 SARS-COV-2 transmission. We found that a reduction of the epidemic to a manageable level  
277 would be possible with a moderate  $R$  (e.g.  $R = 1.7$  explored here).

278 Improved case finding is the first step towards a successful contact-tracing intervention. We  
279 found that the increase in detection of clinical cases substantially reduced peak incidence  
280 and improved the efficacy of contact tracing. Many countries progressively increased testing  
281 capacity (41) and lifted restrictions on access to testing (44). Easy access to testing is

282 essential to detect cases, because of the substantial fraction of subclinical cases and the  
283 similarity of COVID-19 clinical presentation to the one of other respiratory infections. In the  
284 period from September to November 2020, the French network of virological surveillance run  
285 by general practitioners reported that only 22.7% of Acute Respiratory Infections were  
286 caused by SARS-CoV2, against 46.5% attributed to rhinovirus (45). Given that the majority of  
287 cases do not require hospitalization, case detection effectiveness is also influenced by the  
288 consultation rate. This has been estimated to be around ~30% with peaks at ~45% by the  
289 participatory surveillance platform covidnet.fr (40, 41). Increased population awareness is  
290 thus essential for the efficient monitoring of the epidemic and its containment through contact  
291 tracing.

292 Little information is available on compliance to isolation. Low compliance to isolation was  
293 reported in the UK and in a university campus in the US (46, 47). However, this may vary  
294 greatly according to cultural, socioeconomic and demographic context. Due to a self-  
295 selection bias, individuals who decided to download and use the mobile application may be  
296 more akin to follow the recommendation and isolate if they receive a notification. Step-by-  
297 step recommendations provided by the app can further help in increasing compliance.  
298 Strengthened communication and compensations (such as paid work leave, loss-of-income  
299 payments for self-employed professionals, medical school-absence certificates) should be  
300 implemented to increase the acceptability of isolation (48).

301 App adoption remains the key factor determining the efficacy of digital contact tracing.  
302 Adoption levels were initially low (<5%) in many countries (e.g. Italy, France), increasing later  
303 as the second wave was rising, likely due to increased concerns of the population. As of  
304 November 2020, 17% and 13% of the population had downloaded the app in Italy and  
305 France, respectively (49, 50). Higher levels were observed, e.g., in Australia (6 millions  
306 download, 25% of the population) (51) and Iceland (~150 thousand, 38%) (52). Importantly,  
307 official figures may overestimate real adoption levels, since many individuals may download  
308 the application without using it. In France this proportion was 60% among university students

309 (53). Individuals may be more inclined to use the app if they perceive a direct and immediate  
310 benefit from its use. This may be implemented through, e.g., easy access to testing in case  
311 they are notified as contacts and assistance by public health professionals. Moreover, even if  
312 the application preserves users' privacy and can be downloaded on a voluntary basis in  
313 many countries, increased transparency and ethical debate remain essential to reassure the  
314 population about data treatment (53–55).

315 The results presented here are based on an agent-based model that describes age-specific  
316 risk factors for exposure and transmission: contact rates, contacts by location, susceptibility  
317 to the virus, probability of being detected and rate of app adoption. The interplay between  
318 these features has a profound impact on COVID-19 spread and affects the efficacy of  
319 household isolation and digital contact tracing. To account for contact heterogeneities we  
320 used statistics on population demography, combined with social contact surveys to build a  
321 multi-setting contact network, similarly to previous works (17, 21, 26, 30–32). The network is  
322 also dynamic in time as it captures the repetition of a certain number of contacts (e.g.  
323 relationships) and the occurrence of random encounters. Social contact data provide an  
324 invaluable information source to study the current COVID-19 outbreak (1, 36). Previous  
325 projections on the impact of contact tracing rely on a similar approach in some cases (17, 24,  
326 26). Other works make use of high resolution data (18, 19, 22), that are more reliable than  
327 contact surveys, but are restricted to specific settings or population groups. Despite the  
328 difference in the data source and approach, the results of these studies are consistent and in  
329 agreement with our work on the overall impact of the intervention.

330 We modelled age-specific epidemiological characteristics based on available knowledge in  
331 the literature. Children are less impacted by the COVID-19 epidemic (9–13). This may be  
332 explained by reduced susceptibility and severity, with accumulating evidence that both  
333 effects are acting simultaneously (10). The strength of these effects is still debated and the  
334 infection risk for children should not be minimized. However, these differences have  
335 implications for digital contact tracing. Indeed, it is precisely in the group that plays a central

336 role in transmission and where cases are more likely symptomatic (i.e., adults) that the app  
337 coverage is already the highest. Our model shows that taken together, these characteristics  
338 reinforce the impact of digital tracing and provides indirect protection in the elderly  
339 population. This occurs even if no adoption is registered in the elderly population.

340 Our study is affected by limitations. First, we analyzed the effect of digital contact tracing on  
341 COVID-19 incidence in the general population. Crucial information for public health  
342 authorities would be to quantify the effect in time of these measures on hospitalizations. This  
343 would require to couple our model for COVID-19 transmission in the general population with  
344 a model describing disease severity and within-hospital patient trajectories (17, 21, 26).  
345 Second, the model does not account for transmission in nursing homes. This setting is where  
346 the majority of transmissions among elderly occurred. At the same time, however, the  
347 response to the COVID-19 epidemic in this setting relies mostly on routine screening of  
348 symptoms and frequent testing of residents, together with face masks and strict hygiene  
349 rules for visitors. Third, results may be conservative as clustering effects and large  
350 fluctuations in the number of contacts per person (56) are only partially captured by the  
351 model thanks to the repetition of contacts, but effects may be larger in real contact patterns.  
352 This also includes crowding events playing an important role in the transmission dynamics  
353 (15). Overall behaviors obtained with our synthetic network of contacts are however  
354 compatible with findings obtained with real contact data (18). In a future work the description  
355 of temporal and topological properties of contacts in workplaces, schools and community  
356 could be improved by using modeling frameworks informed by detailed contact data, that has  
357 become available for specific settings (57–59). For this purpose, frameworks such as hidden  
358 variable models or other recent dynamical models for social networks could be employed  
359 (60–62). Fourth, other assumptions may be instead optimistic, regarding the probability of  
360 detection of index cases, and compliance to isolation, for example. Few data are available to  
361 inform these parameters that may also vary over time (depending on the epidemic context  
362 and increased population fatigue) and across countries (depending on cultural aspects and

363 regulations in place). While we explored a range of parameter values, more detailed  
364 information will be needed to contextualize our approach to a specific epidemic situation in a  
365 given country.

## 366 **Material and Methods**

### 367 **Synthetic population**

368 The model simulates the population of Metropolitan France representing individual  
369 inhabitants. This approach is similar to studies done previously e.g. for Italy(27) and for  
370 USA(28). The French synthetic population is based on the National Institute of Statistics and  
371 Economic Studies (INSEE) censuses. Individuals were assigned to municipalities according  
372 to the administrative borders. The number of households and the age structure of their  
373 inhabitants, sizes of schools and workplaces, fluxes of commuters between municipalities  
374 also followed the distribution of these statistics found in the INSEE data. Population size was  
375 kept constant through a simulation as we aimed at simulating one season of the epidemic.

376 To generate the population, we defined several statistics derived from INSEE publicly  
377 available data:

- 378 • The list of municipalities (“les communes de France”) of Metropolitan France (2015) with  
379 each municipality described by its INSEE code, population size, number of schools of six  
380 different levels (from kindergarten to university), number of workplaces in given size  
381 categories (0-9, 10-49, 50-99, 100-499, 500-999 and over 1000 employees) (Populations  
382 légales 2017, INSEE, <https://www.insee.fr/fr/statistiques/4265429?sommaire=4265511>).
- 383 • Statistics regarding the percentage of people in given age groups enrolled in each of six  
384 school levels, employed and unemployed (Bilan démographique 2010, INSEE,  
385 <https://www.insee.fr/fr/statistiques/1280950>).
- 386 • The age pyramid for France as the population fractions of individuals of a given age  
387 (Bilan démographique 2010, INSEE, <https://www.insee.fr/fr/statistiques/1280950>).



- 388 • The number of people commuting to work between each pair of municipalities (Mobilités  
389 professionnelles en 2016: déplacements domicile - lieu de travail, INSEE,  
390 <https://www.insee.fr/fr/statistiques/4171554>).
- 391 • The number of people commuting to school between each pair of municipalities  
392 (Mobilités scolaires en 2015: déplacements domicile - lieu d'études, INSEE,  
393 <https://www.insee.fr/fr/statistiques/3566470>).
- 394 • The probability distributions of sizes of households in France (Couples - Familles -  
395 Ménages en 2010. INSEE, [https://www.insee.fr/fr/statistiques/2044286/?geo=COM-](https://www.insee.fr/fr/statistiques/2044286/?geo=COM-34150)  
396 34150.)
- 397 • The probability of individuals belonging to a particular age class, given their role in the  
398 household: child of a couple, child of a single adult, adult in a couple without children,  
399 adult in a couple with children (Couples - Familles - Ménages en 2010. INSEE,  
400 <https://www.insee.fr/fr/statistiques/2044286/?geo=COM-34150>).

401 With the above statistics, the synthetic population was generated in the following steps:

- 402 1. Initialization of all the municipalities with an appropriate number of schools of each type  
403 and workplaces of given sizes.
- 404 2. Creation of schools in each municipality according to given statistics.
- 405 3. Creation of workplaces in each municipality according to given statistics.
- 406 4. Definition of the commuter fluxes between municipalities.

407 Each municipality has a defined number of inhabitants and individuals are created (one by  
408 one) until this number is reached. Each individual was assigned an age, a school or a  
409 workplace (or is assigned to stay at home) according to probability distributions derived from  
410 the data mentioned above.

411 The numbers of households within each municipality were not defined explicitly, but  
412 depended on the number of individuals. The municipal population size and statistics



413 regarding family demographics constrain the number of households. Additional details on the  
414 algorithm for the population reconstruction are provided in the Supplementary Material.

### 415 **Face-to-face contact network**

416 The synthetic population encodes information on the school, workplace, household and  
417 community each individual belongs to. We used this information to extract a dynamic network  
418 representing daily face-to-face contacts. We parametrized this network based on contacts'  
419 statistics for the French population (33).

420 First, we generated a time aggregated network representing all contacts that can potentially  
421 occur – we will call this the *acquaintance network*, with some abuse of language since it  
422 includes also sporadic contacts. Second, to each contact we assigned a daily rate of  
423 activation. Then, in the course of the simulation we sampled contacts each day based on  
424 their rate.

425 The acquaintance network has five distinct layers representing contacts in household (layer  
426  $H$ ), workplace (layer  $W$ ), school (layer  $S$ ), community (layer  $C$ ) and transports (layer  $T$ ). The  
427 household layer is formed by a collection of complete networks linking individuals in the  
428 same household. The  $W$ ,  $S$ ,  $C$ , and  $T$  layers are formed by collections of Erdős–  
429 Rényi networks generated in each location  $i$ , with average degree  $\chi_i$ . A location can be a  
430 workplace ( $W$  layer), a school ( $S$  layer) and a municipality ( $C$  and  $T$  layers).  $\chi_i$  is extracted at  
431 random for each place and depends on the type and size of the location. In particular, when  
432 the size of a location is small we assume that each individual enters in contact with all the  
433 others frequenting the same place. As the size increases the number of contacts saturates.

434 Once the acquaintance network was built a daily activation rate  $x$  was assigned to each link  
435 according to a cumulative distribution that depends on the layer  $s$ . For simplicity we assumed  
436 this distribution to be the same for  $s = W, S, C$ , while we allowed it to be different in household  
437 (where contacts are more frequent) and in transports (where contacts are sporadic).

438 Parameters were tuned based on average daily number of contacts, proportion of contacts  
439 by setting, and contact frequency as provided in (33) (Figure 1 C D). Additional details on the  
440 network reconstruction and parametrization are provided in the Supplementary Material.

#### 441 **Transmission model**

442 We defined a minimal model of COVID-19 spread in the general population that accounts for  
443 two levels of symptoms: none to mild (subclinical cases,  $I_{sc}$ ), and moderate to severe (clinical  
444 cases,  $I_c$ ). We assumed that clinical cases stay at home after developing symptoms.

445 Susceptible individuals, if in contact with infectious ones, may get infected and enter the  
446 exposed compartment ( $E$ ). After an average latency period  $\epsilon^{-1}$  they become infectious,  
447 developing a subclinical infection with probability  $p_{sc}^A$  and a clinical infection otherwise. From  
448  $E$ , before entering in either  $I_{sc}$  or  $I_c$ , individuals enter first a prodromal phase (either  $I_{p,sc}$  or  
449  $I_{p,c}$ ), that lasts on average  $\mu_p^{-1}$  days and where individuals do not show any sign of illness,  
450 despite being already infectious. Contact-tracing, population-screening and modelling studies  
451 provide evidence that infectivity is related to the level of symptoms, with less severely hit  
452 individuals being also less infectious (11, 43). Therefore, we assumed that subclinical cases,  
453  $I_{p,sc}$  and  $I_{sc}$  have a reduced transmissibility compared to  $I_{p,c}$  and  $I_c$ . This is modulated by the  
454 scaling factor  $\beta_I$ . We neglected hospitalization and death and assumed that with rate  $\mu$   
455 infected individuals become recovered.

456 The impact of COVID-19 is heterogeneous across age groups (9–13). This may be driven by  
457 differences in susceptibility (9), differences in clinical manifestation (11, 13) or both (10). We  
458 considered here both effects in agreement with recent modelling estimates (10).

459 Susceptibility by age,  $\sigma_A$ , was parametrized from (9), while clinical manifestation,  $p_{sc}^A$ , was  
460 parametrized from a large-scale descriptive study of the COVID19 outbreak in Italy (13).

461 Transition rates are summarized in Figure 2 B, and parameters and their values are listed in  
462 Table 1. The incubation period was estimated to be around 5.2 days from an early analysis  
463 of 425 patients in Wuhan (34). COVID-19 transmission potential varies across settings,

464 populations and social contexts (14–16). In particular, indoor places were found to increase  
465 the odds of contagion 18.7 times compared to an open-air environment (16). In our model we  
466 assumed that all contacts at work, school and transport occur indoor and have the same  
467 transmission risk ( $\omega_S$ ). In the contact survey of Béraud et al. (33), 46% of contacts in the  
468 community were occurring outdoors. Combining this information with the 18.7 indoor vs.  
469 outdoor risk ratio leads to a 60% relative risk of community contacts with respect to  
470 workplace/school/transport contacts. Contacts within households are generally associated to  
471 a higher risk with respect to other settings, because they last longer and there is a higher risk  
472 of environmental transmission. We assumed that the transmission risk associated with them  
473 is twice the one in workplace/school/transport. For the basic reproductive ratio of COVID-19  
474 we took  $R_0 \sim 3.1$  (1, 36). We also explored lower levels of transmission potential, i.e.  
475 reproductive ratios  $R$  down to 1.5, to effectively account for behavioral changes and adoption  
476 of barrier measures. Our definition of  $R$  does not integrate population immunity. We explicitly  
477 indicate the initial level of population immunity to disentangle the relative role of the two  
478 quantities.

## 479 **Modelling contact tracing**

### 480 **Self-isolation and isolation of household contacts**

481 Self-isolation and isolation of household contacts was modelled according to following rules:

- 482 • As an individual shows clinical symptoms, s/he is detected with probability  
483  $p_{d,c}$  (baseline value 50%, additional explored values 30% and 80%). If detected, case  
484 confirmation, isolation and contacts' isolation occur with rate  $r_{d,c} = 0.9$  upon symptoms  
485 onset.
- 486 • Subclinical individuals are also detected with probability  $p_{d,sc}$  (baseline value 5%,  
487 additional explored values 25% and 45%), and rate  $r_{d,sc} = 0.5$ .
- 488 • The individual's family members are isolated with probability  $p_{c,h} = 0.9$  (0.5 and 0.7 were  
489 also explored).

- 490 • We assume that contacts are tested and the follow up guarantees that all individuals who  
491 got infected prior to isolation are detected. Thus, contacts that are negative (either  
492 susceptible or recovered at the time of isolation) terminate their isolation after 7 days.  
493 The index-case and the positive contacts are isolated for 14 days. Contacts with no  
494 clinical symptoms have a daily probability  $p_{drop} = 0.02$  to drop-out from isolation.
- 495 • For both the case and the contacts, isolation is implemented by assuming no contacts  
496 outside the household and contacts within a household having an associated  
497 transmission risk (i.e. the weight  $\omega_H$ ) reduced by a factor  $\iota = 0.5$ .

## 498 **Digital contact tracing**

499 We assumed that contact tracing is adopted in combination with self-isolation and isolation of  
500 household members. Therefore, we added the following rules to the ones outlined above:

- 501 • At the beginning of the simulation, a smartphone is assigned to individuals with  
502 probability  $p_{sm}^A$ , based on the statistics of smartphone penetration (0% for [0,11], 86% for  
503 [12,17], 98% for [18,24], 95% for [25,39], 80% for [40,59], 62% for [60,69], 44% for 70+  
504 (29).
- 505 • Each individual with a smartphone has a probability  $p_a$  to download the app (we explored  
506 values between 0 and 0.9).
- 507 • Only contacts occurring between individuals with a smartphone and the app are traced.
- 508 • If the individual owns a smartphone and downloaded the app the contacts that s/he has  
509 traced in the period since  $D = 7$  days before his/her detection are isolated with probability  
510  $p_{c,a} = 0.9$  (0.5 and 0.7 were also tested).
- 511 • We assume contacts are tested and the follow up guarantees that all individuals who got  
512 infected prior to isolation are detected. Thus, contacts that are negative (either  
513 susceptible or recovered at the time of isolation) terminate their isolation after 7 days.  
514 The index-case and the positive contacts are isolated for 14 days. Contacts with no  
515 clinical symptoms have a daily probability  $p_{drop} = 0.02$  to drop out from isolation.

- 516 • For both the case and the contacts, isolation is implemented by assuming no contacts  
517 outside the household and contacts within a household having an associated  
518 transmission risk (i.e. the weight  $\omega_H$ ) reduced by a factor  $\iota = 0.5$ .

519

## 520 Reference

- 521 1. L. Di Domenico, G. Pullano, C. E. Sabbatini, P.-Y. Boëlle, V. Colizza, Impact of lockdown  
522 on COVID-19 epidemic in Île-de-France and possible exit strategies. *BMC Medicine*. **18**,  
523 240 (2020).
- 524 2. S. Flaxman, S. Mishra, A. Gandy, H. J. T. Unwin, T. A. Mellan, H. Coupland, C. Whittaker,  
525 H. Zhu, T. Berah, J. W. Eaton, M. Monod, A. C. Ghani, C. A. Donnelly, S. M. Riley, M.  
526 A. C. Vollmer, N. M. Ferguson, L. C. Okell, S. Bhatt, Estimating the effects of non-  
527 pharmaceutical interventions on COVID-19 in Europe. *Nature*, 1–8 (2020).
- 528 3. M. Pollán, B. Pérez-Gómez, R. Pastor-Barriuso, J. Oteo, M. A. Hernán, M. Pérez-Olmeda,  
529 J. L. Sanmartín, A. Fernández-García, I. Cruz, N. F. de Larrea, M. Molina, F.  
530 Rodríguez-Cabrera, M. Martín, P. Merino-Amador, J. L. Paniagua, J. F. Muñoz-  
531 Montalvo, F. Blanco, R. Yotti, F. Blanco, R. G. Fernández, M. Martín, S. M. Navarro, M.  
532 Molina, J. F. Muñoz-Montalvo, M. S. Hernández, J. L. Sanmartín, M. Cuenca-Estrella,  
533 R. Yotti, J. L. Paniagua, N. F. de Larrea, P. Fernández-Navarro, R. Pastor-Barriuso, B.  
534 Pérez-Gómez, M. Pollán, A. Avellón, G. Fedele, A. Fernández-García, J. O. Iglesias, M.  
535 T. P. Olmeda, I. Cruz, M. E. F. Martínez, F. D. Rodríguez-Cabrera, M. A. Hernán, S. P.  
536 Fernández, J. M. R. Aguirre, J. M. N. Marí, B. P. Borrás, A. B. P. Jiménez, M.  
537 Rodríguez-Iglesias, A. M. C. Gascón, M. L. L. Alcaine, I. D. Suárez, O. S. Álvarez, M. R.  
538 Pérez, M. C. Sanchís, C. J. V. Gomila, L. C. Saladrigas, A. H. Fernández, A. Oliver, E.  
539 C. Feliciano, M. N. G. Quintana, J. M. B. Fernández, M. A. H. Betancor, M. H. Febles,  
540 L. M. Martín, L.-M. L. López, T. U. Miota, I. D. B. Población, M. S. C. Pérez, M. N. V.  
541 Fernández, T. M. Enríquez, M. V. Arranz, M. D.-G. González, I. Fernández-Natal, G. M.  
542 Lobón, J. L. M. Bellido, P. Ciruela, A. M. i Casals, M. D. Botías, M. A. M. Maeso, D. P.  
543 del Campo, A. F. de Castro, R. L. Ramírez, M. F. E. Retamosa, M. R. González, M. S.  
544 B. Lobeiras, A. F. Losada, A. Aguilera, G. Bou, Y. Caro, N. Marauri, L. M. S. Blanco, I.  
545 del C. González, M. H. Pascual, R. A. Fernández, P. Merino-Amador, N. C. Castro, A.  
546 T. Lizcano, C. R. Almagro, M. S. Hernández, N. A. Elizaga, M. E. Sanz, C. E.  
547 Baquedano, A. B. Bascaran, S. I. Tamayo, L. E. Otazua, R. B. Benarroch, J. L. Flores,  
548 A. V. de la Villa, Prevalence of SARS-CoV-2 in Spain (ENE-COVID): a nationwide,  
549 population-based seroepidemiological study. *The Lancet*. **0** (2020), doi:10.1016/S0140-  
550 6736(20)31483-5.
- 551 4. F. Carrat, X. de Lamballerie, D. Rahib, H. Blanche, N. Lapidus, F. Artaud, S. Kab, A.  
552 Renuy, F. S. de Edelenyi, L. Meyer, N. Lydie, M.-A. Charles, P.-Y. Ancel, F. Jusot, A.  
553 Rouquette, S. Priet, P. M. S. Villaroel, T. Fourie, C. Lusivika-Nzinga, J. Nicol, S. Legot,  
554 N. Druesne-Pecollo, Y. Essedik, C. Lai, J.-M. Gagliolo, J.-F. Deleuze, N. Bajos, G.  
555 Severi, M. Touvier, M. Zins, Seroprevalence of SARS-CoV-2 among adults in three  
556 regions of France following the lockdown and associated risk factors: a multicohort  
557 study. *medRxiv* (2020), doi:10.1101/2020.09.16.20195693.
- 558 5. S. L. Vu, G. Jones, F. Anna, T. Rose, J.-B. Richard, S. Bernard-Stoecklin, S. Goyard, C.  
559 Demeret, O. Helynck, C. Robin, V. Monnet, L. P. de Facci, M.-N. Ungeheuer, L. Léon,

- 560 Y. Guillois, L. Filleul, P. Charneau, D. Lévy-Bruhl, S. van der Werf, H. Noel, Prevalence  
561 of SARS-CoV-2 antibodies in France: results from nationwide serological surveillance.  
562 *medRxiv* (2020), doi:10.1101/2020.10.20.20213116.
- 563 6. M. Kendall, L. Milsom, L. Abeler-Dörner, C. Wymant, L. Ferretti, M. Briers, C. Holmes, D.  
564 Bonsall, J. Abeler, C. Fraser, Epidemiological changes on the Isle of Wight after the  
565 launch of the NHS Test and Trace programme: a preliminary analysis. *The Lancet*  
566 *Digital Health*. **0** (2020), doi:10.1016/S2589-7500(20)30241-7.
- 567 7. I. Braithwaite, T. Callender, M. Bullock, R. W. Aldridge, Automated and partly automated  
568 contact tracing: a systematic review to inform the control of COVID-19. *The Lancet*  
569 *Digital Health*. **2**, e607–e621 (2020).
- 570 8. M. Salathé, C. Althaus, N. Anderegg, D. Antonioli, T. Ballouz, E. Bugnon, S. Čapkun, D.  
571 Jackson, S.-I. Kim, J. Larus, N. Low, W. Lueks, D. Menges, C. Moullet, M. Payer, J.  
572 Riou, T. Stadler, C. Troncoso, E. Vayena, V. von Wyl, Early evidence of effectiveness of  
573 digital contact tracing for SARS-CoV-2 in Switzerland. *Swiss Medical Weekly*. **150**  
574 (2020), doi:10.4414/smw.2020.20457.
- 575 9. J. Zhang, M. Litvinova, Y. Liang, Y. Wang, W. Wang, S. Zhao, Q. Wu, S. Merler, C.  
576 Viboud, A. Vespignani, M. Ajelli, H. Yu, Changes in contact patterns shape the  
577 dynamics of the COVID-19 outbreak in China. *Science* (2020),  
578 doi:10.1126/science.abb8001.
- 579 10. N. G. Davies, P. Klepac, Y. Liu, K. Prem, M. Jit, R. M. Eggo, Age-dependent effects in  
580 the transmission and control of COVID-19 epidemics. *Nature Medicine*, 1–7 (2020).
- 581 11. Q. Bi, Y. Wu, S. Mei, C. Ye, X. Zou, Z. Zhang, X. Liu, L. Wei, S. A. Truelove, T. Zhang,  
582 W. Gao, C. Cheng, X. Tang, X. Wu, Y. Wu, B. Sun, S. Huang, Y. Sun, J. Zhang, T. Ma,  
583 J. Lessler, T. Feng, Epidemiology and transmission of COVID-19 in 391 cases and  
584 1286 of their close contacts in Shenzhen, China: a retrospective cohort study. *The*  
585 *Lancet Infectious Diseases*. **0** (2020), doi:10.1016/S1473-3099(20)30287-5.
- 586 12. E. Lavezzo, E. Franchin, C. Ciavarella, G. Cuomo-Dannenburg, L. Barzon, C. Del  
587 Vecchio, L. Rossi, R. Manganelli, A. Loregian, N. Navarin, D. Abate, M. Sciro, S.  
588 Merigliano, E. De Canale, M. C. Vanuzzo, V. Besutti, F. Saluzzo, F. Onelia, M. Pacenti,  
589 S. G. Parisi, G. Carretta, D. Donato, L. Flor, S. Cocchio, G. Masi, A. Sperduti, L.  
590 Cattarino, R. Salvador, M. Nicoletti, F. Caldart, G. Castelli, E. Nieddu, B. Labella, L.  
591 Fava, M. Drigo, K. A. M. Gaythorpe, A. R. Brazzale, S. Toppo, M. Trevisan, V. Baldo, C.  
592 A. Donnelly, N. M. Ferguson, I. Dorigatti, A. Crisanti, Suppression of a SARS-CoV-2  
593 outbreak in the Italian municipality of Vo'. *Nature*. **584**, 425–429 (2020).
- 594 13. F. Riccardo, M. Ajelli, X. D. Andrianou, A. Bella, M. D. Manso, M. Fabiani, S. Bellino, S.  
595 Boros, A. M. Urdiales, V. Marziano, M. C. Rota, A. Fila, F. D'Ancona, A. Siddu, O.  
596 Punzo, F. Trentini, G. Guzzetta, P. Poletti, P. Stefanelli, M. R. Castrucci, A. Ciervo, C.  
597 D. Benedetto, M. Tallon, A. Piccioli, S. Brusaferrò, G. Rezza, S. Merler, P. Pezzotti, the  
598 C.-19 working Group, Epidemiological characteristics of COVID-19 cases and estimates  
599 of the reproductive numbers 1 month into the epidemic, Italy, 28 January to 31 March  
600 2020. *Eurosurveillance*. **25**, 2000790 (2020).
- 601 14. Q. J. Leclerc, N. M. Fuller, L. E. Knight, CMMID COVID-19 Working Group, S. Funk, G.  
602 M. Knight, What settings have been linked to SARS-CoV-2 transmission clusters?  
603 *Wellcome Open Research*. **5**, 83 (2020).



- 604 15. B. M. Althouse, E. A. Wenger, J. C. Miller, S. V. Scarpino, A. Allard, L. Hébert-Dufresne,  
605 H. Hu, Superspreading events in the transmission dynamics of SARS-CoV-2:  
606 Opportunities for interventions and control. *PLOS Biology*. **18**, e3000897 (2020).
- 607 16. H. Nishiura, H. Oshitani, T. Kobayashi, T. Saito, T. Sunagawa, T. Matsui, T. Wakita, M.  
608 C.-19 R. Team, M. Suzuki, Closed environments facilitate secondary transmission of  
609 coronavirus disease 2019 (COVID-19). *medRxiv* (2020),  
610 doi:10.1101/2020.02.28.20029272.
- 611 17. A. Aleta, D. Martín-Corral, A. Pastore y Piontti, M. Ajelli, M. Litvinova, M. Chinazzi, N. E.  
612 Dean, M. E. Halloran, I. M. Longini Jr, S. Merler, A. Pentland, A. Vespignani, E. Moro,  
613 Y. Moreno, Modelling the impact of testing, contact tracing and household quarantine  
614 on second waves of COVID-19. *Nature Human Behaviour*. **4**, 964–971 (2020).
- 615 18. G. Cencetti, G. Santin, A. Longa, E. Pigani, A. Barrat, C. Cattuto, S. Lehmann, B. Lepri,  
616 Using real-world contact networks to quantify the effectiveness of digital contact tracing  
617 and isolation strategies for Covid-19 pandemic. *medRxiv* (2020),  
618 doi:10.1101/2020.05.29.20115915.
- 619 19. A. J. Kucharski, P. Klepac, A. J. K. Conlan, S. M. Kissler, M. L. Tang, H. Fry, J. R. Gog,  
620 W. J. Edmunds, J. C. Emery, G. Medley, J. D. Munday, T. W. Russell, Q. J. Leclerc, C.  
621 Diamond, S. R. Procter, A. Gimma, F. Y. Sun, H. P. Gibbs, A. Rosello, K. van  
622 Zandvoort, S. Hué, S. R. Meakin, A. K. Deol, G. Knight, T. Jombart, A. M. Foss, N. I.  
623 Bosse, K. E. Atkins, B. J. Quilty, R. Lowe, K. Prem, S. Flasche, C. A. B. Pearson, R. M.  
624 G. J. Houben, E. S. Nightingale, A. Endo, D. C. Tully, Y. Liu, J. Villabona-Arenas, K.  
625 O'Reilly, S. Funk, R. M. Eggo, M. Jit, E. M. Rees, J. Hellewell, S. Clifford, C. I. Jarvis, S.  
626 Abbott, M. Auzenbergs, N. G. Davies, D. Simons, Effectiveness of isolation, testing,  
627 contact tracing, and physical distancing on reducing transmission of SARS-CoV-2 in  
628 different settings: a mathematical modelling study. *The Lancet Infectious Diseases*. **0**  
629 (2020), doi:10.1016/S1473-3099(20)30457-6.
- 630 20. L. Ferretti, C. Wymant, M. Kendall, L. Zhao, A. Nurtay, L. Abeler-Dörner, M. Parker, D.  
631 Bonsall, C. Fraser, Quantifying SARS-CoV-2 transmission suggests epidemic control  
632 with digital contact tracing. *Science* (2020), doi:10.1126/science.abb6936.
- 633 21. R. Hinch, W. J. M. Probert, A. Nurtay, M. Kendall, C. Wymatt, M. Hall, K. Lythgoe, A. B.  
634 Cruz, L. Zhao, A. Stewart, L. Ferritti, D. Montero, J. Warren, N. Mather, M. Abueg, N.  
635 Wu, A. Finkelstein, D. G. Bonsall, L. Abeler-Dörner, C. Fraser, OpenABM-Covid19 - an  
636 agent-based model for non-pharmaceutical interventions against COVID-19 including  
637 contact tracing. *medRxiv* (2020), doi:10.1101/2020.09.16.20195925.
- 638 22. A. Barrat, C. Cattuto, M. Kivelä, S. Lehmann, J. Saramäki, Effect of manual and digital  
639 contact tracing on COVID-19 outbreaks: a study on empirical contact data. *medRxiv*  
640 (2020), doi:10.1101/2020.07.24.20159947.
- 641 23. M. Mancastropa, C. Castellano, A. Vezzani, R. Burioni, Stochastic sampling effects  
642 favor manual over digital contact tracing. *arXiv:2010.03399 [cond-mat, physics:physics,*  
643 *q-bio]* (2020) (available at <http://arxiv.org/abs/2010.03399>).
- 644 24. L. Lorch, H. Kremer, W. Trouleau, S. Tsirtsis, A. Szanto, B. Schölkopf, M. Gomez-  
645 Rodriguez, Quantifying the Effects of Contact Tracing, Testing, and Containment  
646 Measures in the Presence of Infection Hotspots. *arXiv:2004.07641 [physics, q-bio, stat]*  
647 (2020) (available at <http://arxiv.org/abs/2004.07641>).

- 648 25. M. E. Kretzschmar, G. Rozhnova, M. C. J. Bootsma, M. van Boven, J. H. H. M. van de  
649 Wiggert, M. J. M. Bonten, Impact of delays on effectiveness of contact tracing strategies  
650 for COVID-19: a modelling study. *The Lancet Public Health*. **5**, e452–e459 (2020).
- 651 26. M. Abueg, R. Hinch, N. Wu, L. Liu, W. J. M. Probert, A. Wu, P. Eastham, Y. Shafi, M.  
652 Rosencrantz, M. Dikovsky, Z. Cheng, A. Nurtay, L. Abeler-Dörner, D. G. Bonsall, M. V.  
653 McConnell, S. O'Banion, C. Fraser, Modeling the combined effect of digital exposure  
654 notification and non-pharmaceutical interventions on the COVID-19 epidemic in  
655 Washington state. *medRxiv* (2020), doi:10.1101/2020.08.29.20184135.
- 656 27. M. Ajelli, B. Gonçalves, D. Balcan, V. Colizza, H. Hu, J. J. Ramasco, S. Merler, A.  
657 Vespignani, Comparing large-scale computational approaches to epidemic modeling:  
658 Agent-based versus structured metapopulation models. *BMC Infectious Diseases*. **10**,  
659 190 (2010).
- 660 28. D. L. Chao, M. E. Halloran, V. J. Obenchain, I. M. L. Jr, FluTE, a Publicly Available  
661 Stochastic Influenza Epidemic Simulation Model. *PLOS Comput Biol*. **6**, e1000656  
662 (2010).
- 663 29. Baromètre du numérique 2019 (2019), (available at  
664 <https://www.credoc.fr/publications/barometre-du-numerique-2019>).
- 665 30. L. Fumanelli, M. Ajelli, P. Manfredi, A. Vespignani, S. Merler, Inferring the Structure of  
666 Social Contacts from Demographic Data in the Analysis of Infectious Diseases Spread.  
667 *PLOS Computational Biology*. **8**, e1002673 (2012).
- 668 31. Q.-H. Liu, M. Ajelli, A. Aleta, S. Merler, Y. Moreno, A. Vespignani, Measurability of the  
669 epidemic reproduction number in data-driven contact networks. *PNAS*. **115**, 12680–  
670 12685 (2018).
- 671 32. D. Mistry, M. Litvinova, A. Pastore y Piontti, M. Chinazzi, L. Fumanelli, M. F. C. Gomes,  
672 S. A. Haque, Q.-H. Liu, K. Mu, X. Xiong, M. E. Halloran, I. M. Longini, S. Merler, M.  
673 Ajelli, A. Vespignani, Inferring high-resolution human mixing patterns for disease  
674 modeling. *Nature Communications*. **12**, 323 (2021).
- 675 33. G. Béraud, S. Kazmierczak, P. Beutels, D. Levy-Bruhl, X. Lenne, N. Mielcarek, Y.  
676 Yazdanpanah, P.-Y. Boëlle, N. Hens, B. Dervaux, The French Connection: The First  
677 Large Population-Based Contact Survey in France Relevant for the Spread of Infectious  
678 Diseases. *PLOS ONE*. **10**, e0133203 (2015).
- 679 34. Q. Li, X. Guan, P. Wu, X. Wang, L. Zhou, Y. Tong, R. Ren, K. S. M. Leung, E. H. Y. Lau,  
680 J. Y. Wong, X. Xing, N. Xiang, Y. Wu, C. Li, Q. Chen, D. Li, T. Liu, J. Zhao, M. Liu, W.  
681 Tu, C. Chen, L. Jin, R. Yang, Q. Wang, S. Zhou, R. Wang, H. Liu, Y. Luo, Y. Liu, G.  
682 Shao, H. Li, Z. Tao, Y. Yang, Z. Deng, B. Liu, Z. Ma, Y. Zhang, G. Shi, T. T. Y. Lam, J.  
683 T. Wu, G. F. Gao, B. J. Cowling, B. Yang, G. M. Leung, Z. Feng, Early Transmission  
684 Dynamics in Wuhan, China, of Novel Coronavirus-Infected Pneumonia. *New England*  
685 *Journal of Medicine*. **382**, 1199–1207 (2020).
- 686 35. X. He, E. H. Y. Lau, P. Wu, X. Deng, J. Wang, X. Hao, Y. C. Lau, J. Y. Wong, Y. Guan,  
687 X. Tan, X. Mo, Y. Chen, B. Liao, W. Chen, F. Hu, Q. Zhang, M. Zhong, Y. Wu, L. Zhao,  
688 F. Zhang, B. J. Cowling, F. Li, G. M. Leung, Temporal dynamics in viral shedding and  
689 transmissibility of COVID-19. *Nature Medicine*, 1–4 (2020).
- 690 36. H. Salje, C. T. Kiem, N. Lefrancq, N. Courtejoie, P. Bosetti, J. Paireau, A. Andronico, N.  
691 Hozé, J. Richet, C.-L. Dubost, Y. L. Strat, J. Lessler, D. Levy-Bruhl, A. Fontanet, L.



- 692 Opatowski, P.-Y. Boelle, S. Cauchemez, Estimating the burden of SARS-CoV-2 in  
693 France. *Science* (2020), doi:10.1126/science.abc3517.
- 694 37. D. Cereda, M. Tirani, F. Rovida, V. Demicheli, M. Ajelli, P. Poletti, F. Trentini, G.  
695 Guzzetta, V. Marziano, A. Barone, M. Magoni, S. Deandrea, G. Diurno, M. Lombardo,  
696 M. Faccini, A. Pan, R. Bruno, E. Pariani, G. Grasselli, A. Piatti, M. Gramegna, F.  
697 Baldanti, A. Melegaro, S. Merler, The early phase of the COVID-19 outbreak in  
698 Lombardy, Italy. *arXiv:2003.09320 [q-bio]* (2020) (available at  
699 <http://arxiv.org/abs/2003.09320>).
- 700 38. mbevand, *mbevand/florida-covid19-line-list-data* (2020);  
701 <https://github.com/mbevand/florida-covid19-line-list-data>).
- 702 39. Stay-at-home requirements during the COVID-19 pandemic. *Our World in Data*,  
703 (available at <https://ourworldindata.org/grapher/stay-at-home-covid>).
- 704 40. SPF, COVID-19 : point épidémiologique du 19 novembre 2020, (available at </maladies-et-traumatismes/maladies-et-infections-respiratoires/infection-a-coronavirus/documents/bulletin-national/covid-19-point-epidemiologique-du-19-novembre-2020>).
- 708 41. G. Pullano, L. Di Domenico, C. E. Sabbatini, E. Valdano, C. Turbelin, M. Debin, C.  
709 Guerrisi, C. Kengne-Kuetche, C. Souty, T. Hanslik, T. Blanchon, P.-Y. Boëlle, J. Fioni,  
710 S. Vaux, C. Campèse, S. Bernard-Stoecklin, V. Colizza, Underdetection of COVID-19  
711 cases in France threatens epidemic control. *Nature*, 1–9 (2020).
- 712 42. G. Pullano, E. Valdano, N. Scarpa, S. Rubrichi, V. Colizza, Evaluating the effect of  
713 demographic factors, socioeconomic factors, and risk aversion on mobility during the  
714 COVID-19 epidemic in France under lockdown: a population-based study. *The Lancet Digital Health*. **2**, e638–e649 (2020).
- 716 43. R. Li, S. Pei, B. Chen, Y. Song, T. Zhang, W. Yang, J. Shaman, Substantial  
717 undocumented infection facilitates the rapid dissemination of novel coronavirus (SARS-  
718 CoV-2). *Science*. **368**, 489–493 (2020).
- 719 44. Coronavirus (COVID-19) Testing - Statistics and Research. *Our World in Data*, (available  
720 at <https://ourworldindata.org/coronavirus-testing>).
- 721 45. Réseau Sentinelles > France > Accueil, (available at  
722 <https://websenti.u707.jussieu.fr/sentiweb/>).
- 723 46. L. E. Smith, H. W. W. Potts, R. Amlot, N. T. Fear, S. Michie, J. Rubin, Adherence to the  
724 test, trace and isolate system: results from a time series of 21 nationally representative  
725 surveys in the UK (the COVID-19 Rapid Survey of Adherence to Interventions and  
726 Responses [CORSAIR] study). *medRxiv* (2020), doi:10.1101/2020.09.15.20191957.
- 727 47. K. Chang, A University Had a Great Coronavirus Plan, but Students Partied On. *The*  
728 *New York Times* (2020), (available at  
729 <https://www.nytimes.com/2020/09/10/health/university-illinois-covid.html>).
- 730 48. L. Atlani-Duault, B. Lina, D. Malvy, Y. Yazdanpanah, F. Chauvin, J.-F. Delfraissy,  
731 COVID-19: France grapples with the pragmatics of isolation. *The Lancet Public Health*.  
732 **5**, e573–e574 (2020).
- 733 49. TousAntiCovid sur Twitter. *Twitter*, (available at  
734 <https://twitter.com/TousAntiCovid/status/1328272121177452551>).

- 735 50. Immuni - I numeri di Immuni, (available at [www.immuni.italia.it](http://www.immuni.italia.it)).
- 736 51. The curve of people downloading COVIDSafe has flattened. Has the app done enough?  
737 (2020), (available at [https://www.abc.net.au/news/2020-06-02/coronavirus-covid19-](https://www.abc.net.au/news/2020-06-02/coronavirus-covid19-covidsafe-app-how-many-downloads-greg-hunt/12295130)  
738 [covidsafe-app-how-many-downloads-greg-hunt/12295130](https://www.abc.net.au/news/2020-06-02/coronavirus-covid19-covidsafe-app-how-many-downloads-greg-hunt/12295130)).
- 739 52. Nearly 40% of Icelanders are using a covid app—and it hasn't helped much. *MIT*  
740 *Technology Review*, (available at  
741 <https://www.technologyreview.com/2020/05/11/1001541/iceland-rakning-c19-covid->  
742 [contact-tracing/](https://www.technologyreview.com/2020/05/11/1001541/iceland-rakning-c19-covid-contact-tracing/)).
- 743 53. I. Montagni, N. Roussel, R. Thiébaud, C. Tzourio, The French Covid-19 contact tracing  
744 app: knowledge, attitudes, beliefs and practices of students in the health domain. *J Med*  
745 *Internet Res* (2021), doi:10.2196/26399.
- 746 54. *DP-3T/documents* (DP<sup>3</sup>T, 2020; <https://github.com/DP-3T/documents>).
- 747 55. M. Nanni, G. Andrienko, A.-L. Barabási, C. Boldrini, F. Bonchi, C. Cattuto, F.  
748 Chiaromonte, G. Comandé, M. Conti, M. Coté, F. Dignum, V. Dignum, J. Domingo-  
749 Ferrer, P. Ferragina, F. Giannotti, R. Guidotti, D. Helbing, K. Kaski, J. Kertesz, S.  
750 Lehmann, B. Lepri, P. Lukowicz, S. Matwin, D. M. Jiménez, A. Monreale, K. Morik, N.  
751 Oliver, A. Passarella, A. Passerini, D. Pedreschi, A. Pentland, F. Pianesi, F. Pratesi, S.  
752 Rinzivillo, S. Ruggieri, A. Siebes, V. Torra, R. Trasarti, J. van den Hoven, A.  
753 Vespignani, Give more data, awareness and control to individual citizens, and they will  
754 help COVID-19 containment. *Ethics Inf Technol* (2021), doi:10.1007/s10676-020-  
755 09572-w.
- 756 56. I. Z. Kiss, D. M. Green, R. R. Kao, Infectious disease control using contact tracing in  
757 random and scale-free networks. *Journal of The Royal Society Interface*. **3**, 55–62  
758 (2006).
- 759 57. J. Stehlé, N. Voirin, A. Barrat, C. Cattuto, L. Isella, J.-F. Pinton, M. Quaggiotto, W. V. den  
760 Broeck, C. Régis, B. Lina, P. Vanhems, High-Resolution Measurements of Face-to-  
761 Face Contact Patterns in a Primary School. *PLOS ONE*. **6**, e23176 (2011).
- 762 58. M. Génois, A. Barrat, Can co-location be used as a proxy for face-to-face contacts? *EPJ*  
763 *Data Sci*. **7**, 1–18 (2018).
- 764 59. D. J. A. Toth, M. Leecaster, W. B. P. Pettey, A. V. Gundlapalli, H. Gao, J. J. Rainey, A.  
765 Uzicanin, M. H. Samore, The role of heterogeneity in contact timing and duration in  
766 network models of influenza spread in schools. *Journal of The Royal Society Interface*.  
767 **12**, 20150279 (2015).
- 768 60. H. Hartle, F. Papadopoulos, D. Krioukov, Dynamic Hidden-Variable Network Models.  
769 *arXiv:2101.00414 [physics]* (2021) (available at <http://arxiv.org/abs/2101.00414>).
- 770 61. M. Boguñá, R. Pastor-Satorras, Class of correlated random networks with hidden  
771 variables. *Phys. Rev. E*. **68**, 036112 (2003).
- 772 62. G. Laurent, J. Saramäki, M. Karsai, From calls to communities: a model for time-varying  
773 social networks. *Eur. Phys. J. B*. **88**, 301 (2015).
- 774

## 775 **Acknowledgements**

776 **Funding:** This study was partially supported by the ANR project DATAREDUX (ANR-19-  
777 CE46-0008-01) to AB, VC and PYB; EU H2020 grants MOOD (H2020-874850) to VC, CP,  
778 and PYB, and RECOVER (H2020-101003589) to VC; the Municipality of Paris  
779 (<https://www.paris.fr/>) through the programme Emergence(s) to JAML, BAG, PB, FP and CP;  
780 the ANR and Fondation de France through the project NoCOV (00105995) to PYB, CP; the  
781 Spanish Ministry of Science and Innovation to JAML and BAG, the AEI and FEDER (EU)  
782 under the grant PACSS (RTI2018-093732-B-C22) JAML and BAG; the Maria de Maeztu  
783 program for Units of Excellence in R&D (MDM-2017-0711) to JAML and BAG.

784 **Author contributions:** CP conceived the study; PYB, VC, AB, CP designed the study and  
785 interpreted the results; CP, wrote the original draft; PB, LB, FP implemented the synthetic  
786 population model; JAML, BAG, implemented the epidemic model; All authors edited the  
787 manuscript and approved its final version. **Competing interests:** All authors declare that  
788 they have no competing interests. **Data and materials availability:** All data needed to  
789 evaluate the conclusions in the paper are present in the paper or available from public  
790 sources cited on the paper.

791 **Figures and Tables**

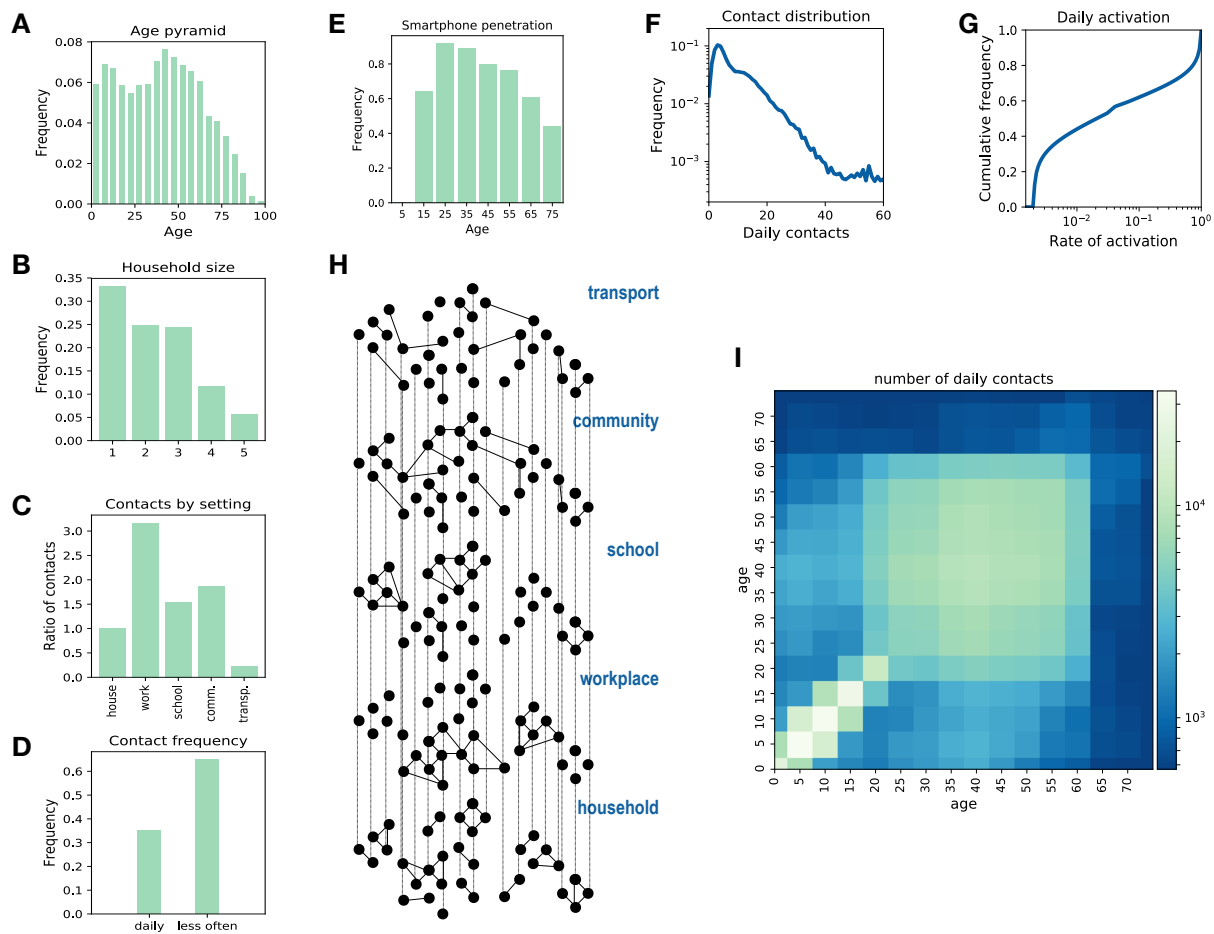

792

793 **Figure 1 Synthetic population.** **A-E** Key statistics used as input for the synthetic population reconstruction. **A**  
 794 Age pyramid for France (source INSEE). **B** Household size (source INSEE). **C** Ratio of contacts by setting with  
 795 respect to household contacts (33). **D** Fraction of contacts occurring each day or less frequently (33). **E**  
 796 Smartphone penetration by age. The overall average adoption in the population is 64% (29). **F** Distribution of the  
 797 number of daily contacts in the model. **G** Cumulative distribution of the activation rate associated to the contacts  
 798 in the model, calibrated in order to be consistent with the information of panel D. **H** Sketch of the construction of  
 799 the contact network: contacts among individuals were represented as a multi-layer dynamical network, where  
 800 each layer includes contacts occurring in a specific setting. **I** Age contact matrix computed from the contact  
 801 network model.

802

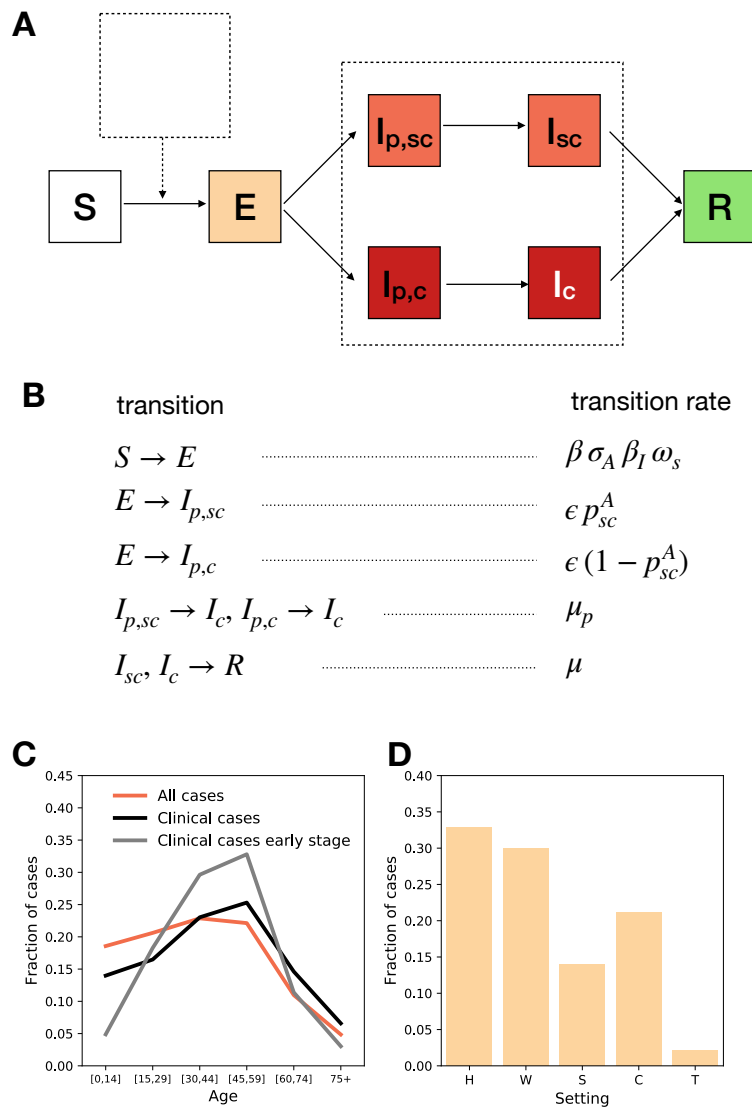

803

804 **Figure 2. Modelling COVID-19 epidemic. A, B** Compartmental model summarizing the epidemic states and  
 805 transitions between states. Parameters and their values are reported in Table 1. **C** Cases by age for an  
 806 uncontrolled epidemic. We show all cases (clinical and subclinical) in red and clinical cases in black. The grey line  
 807 shows the clinical cases in the early stage of the epidemic (here defined as the first 30 days), with less cases  
 808 among children than in later stages. **D** Transmission by setting (H, W, S, C, T stand respectively for household,  
 809 workplace, school, community, transport). The simulations were done with  $\beta = 0.25$  corresponding to  $R_0 = 3.1$ .  
 810 Additional aspects of the outbreak are reported in the Supplementary Material.

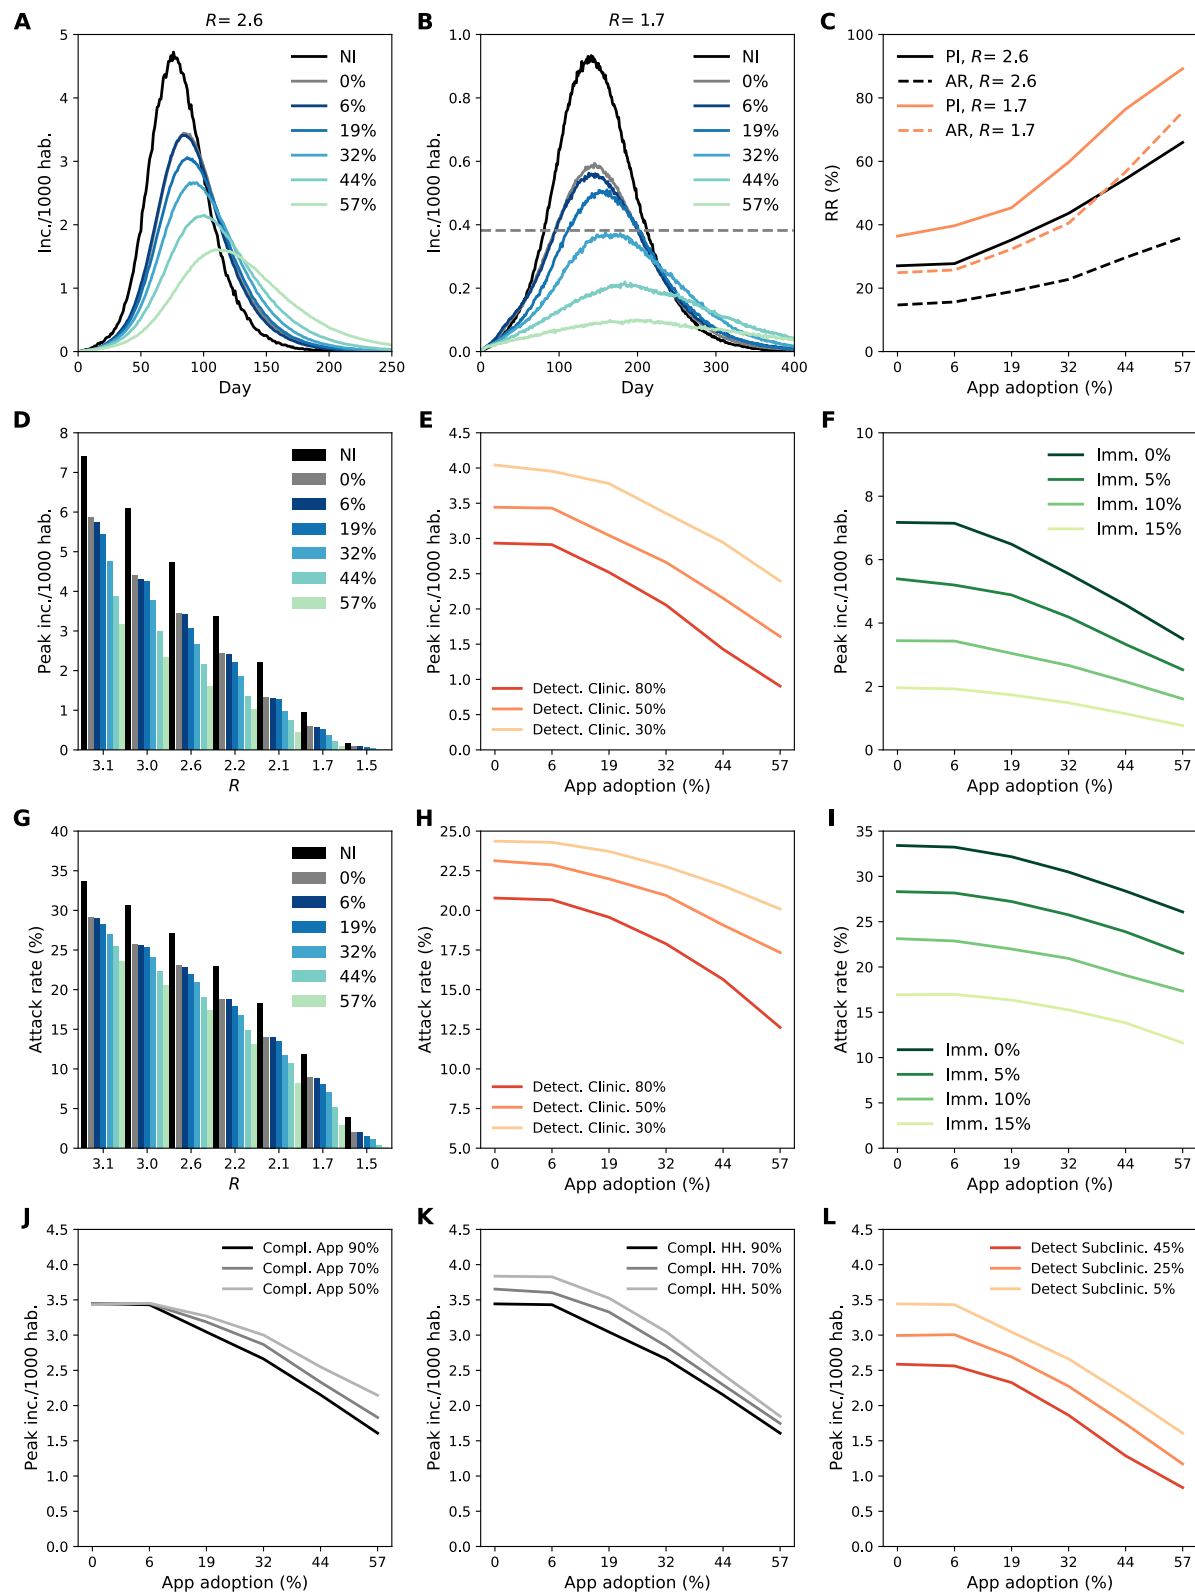

811

812 **Figure 3 Impact of digital contact tracing and household isolation on the epidemic. A, B** Incidence (clinical  
 813 cases) according to app adoption for  $R = 2.6$  and  $R = 1.7$ , respectively. The black curve shows the scenario with  
 814 no intervention (NI). Other curves correspond to app adoption levels ranging from 0% (household isolation only)  
 815 to 57% (90% of smartphone users). Incidence threshold level corresponding to ICU saturation is shown as a

816 dashed grey line in panel B. **C** Relative reduction ( $RR$ ) in attack rate ( $AR$ ) and peak incidence ( $PI$ ) as a function of  
 817 the app adoption for the scenarii shown in A and B.  $RR$  is computed as  $\frac{x_{ref}-x}{x_{ref}}$ , where  $x$  is either  $PI$  or  $AR$  and  $x_{ref}$   
 818 is the value of the quantity with no intervention. Attack rate is computed as cumulative incidence discounting initial  
 819 immunity (10%). **D, G** Peak incidence and attack rate according to reproduction ratio  $R$  and app adoption. **E, H**  
 820 Peak incidence and attack rate according to app adoption and percentage of clinical cases detected. **F, I** Peak  
 821 incidence and attack rate according to app adoption and initial immunity. **J** Peak incidence according to app  
 822 adoption and compliance to isolation of contacts notified by the app. **K** Peak incidence according to app adoption  
 823 and compliance to isolation of household contacts. **L** Peak incidence according to app adoption and percentage  
 824 of subclinical cases detected. Except as otherwise indicated, parameters values were: initial immunity 10%,  
 825 clinical case detection 50%, subclinical case detection 5%, compliance to isolation of contacts notified by the app  
 826 90%, compliance to isolation of household contacts 90%,  $R = 2.6$ .

827

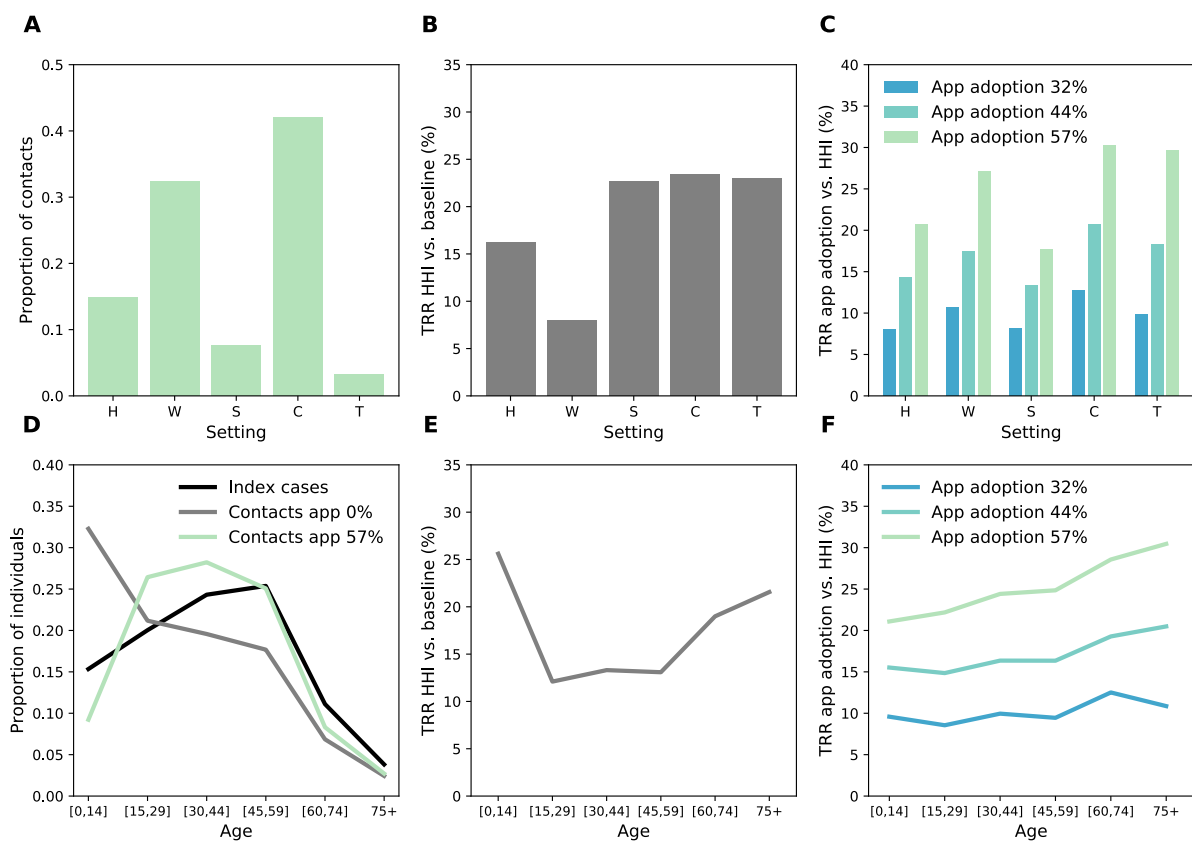

828

829 **Figure 4 Effect of digital contact tracing and household isolation by age and setting. A** Repartition among  
 830 the different settings of the contacts detected by contact tracing (57% app adoption). **B** Relative reduction in  
 831 transmission ( $TRR$ ) by setting obtained with household isolation. The relative reduction in transmission is here  
 832 defined as  $TRR(s) = \frac{I_{ref}^s - I^s}{I_{ref}^s}$ , where  $I^s$  is the total number of clinical and subclinical cases infected in setting  $s$ , in

833 the given intervention scenario considered (here household isolation) and  $I_{ref}^S$  is the same quantity in the  
 834 reference scenario (here the scenario with no intervention). **C** *TRR* obtained with digital contact tracing with  
 835 respect to household isolation only, for three values of app adoption. **D** Repartition among the different age  
 836 groups of the index cases and of the detected contacts, in a scenario with household isolation only, and with the  
 837 inclusion of digital contact tracing (57% app adoption). The repartition of index cases is very similar in the two  
 838 scenarios, thus only the one with household isolation is shown for the sake of clarity. **E** *TRR* by age group of the  
 839 infected as obtained with household isolation only. **F** *TRR* of digital contact tracing with respect to household  
 840 isolation only. We assume  $R = 2.6$ , immunity 10% and probability of detection 50%.

841

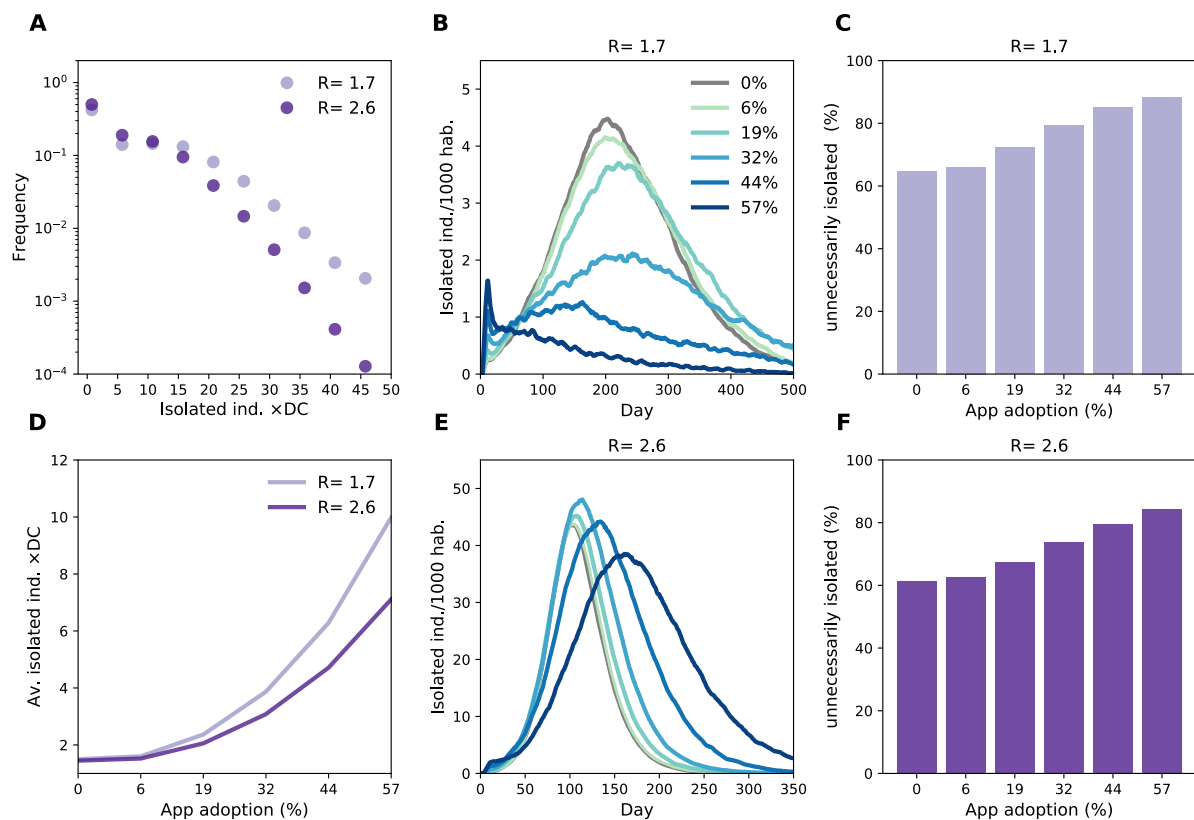

842

843 **Figure 5 impact of combined digital contact tracing and household isolation on the isolation of**  
 844 **individuals. A** Distribution of the number of isolated individuals per detected case (DC) for 57% of  
 845 app adoption. **D** Average number of isolated individuals per detected case as a function of app  
 846 adoption. **B, E** Percentage of the population isolated as a function of time for  $R = 1.7$  (**B**)  $R = 2.6$  (**E**).  
 847 **C, F**: Fraction of unnecessary isolated, i.e. fraction of contacts isolated without being positive.

848 **Table 1. Compartmental model parameters and their values**



| Parameter  | Description                                                  | Values                                                                                                                                                                                                                                                                                       | Source            |
|------------|--------------------------------------------------------------|----------------------------------------------------------------------------------------------------------------------------------------------------------------------------------------------------------------------------------------------------------------------------------------------|-------------------|
| $IP$       | Incubation period                                            | 5.2 days                                                                                                                                                                                                                                                                                     | (34)              |
| $\mu_p$    | Rate of developing symptoms for pre-symptomatic individuals  | $(2.3 \text{ days})^{-1}$                                                                                                                                                                                                                                                                    | (35)              |
| $\epsilon$ | Rate of becoming infectious for exposed individuals          | $(2.9 \text{ days})^{-1}$                                                                                                                                                                                                                                                                    | $IP - \mu_p^{-1}$ |
| $\mu$      | Recovery rate                                                | $(7 \text{ days})^{-1}$                                                                                                                                                                                                                                                                      | (35)              |
| $\beta_I$  | transmissibility rescaling according to the infectious stage | 0.51 for $I_{p,sc}, I_{sc}$<br>1 for $I_{p,c}, I_c$                                                                                                                                                                                                                                          | (1)               |
| $\omega_s$ | Transmission risk by layer                                   | 1 for $H$ layer<br>0.3 for $C$ layer<br>0.5 otherwise                                                                                                                                                                                                                                        | (16, 33)          |
| $\beta$    | Transmission rate                                            | Explored between 0.1 to 0.25                                                                                                                                                                                                                                                                 |                   |
| $\sigma_A$ | susceptibility                                               | 0.23 for $A$ in [0,14]<br>0.68 for $A$ in [15,64]<br>1 for $A$ in 65 +                                                                                                                                                                                                                       | (9)               |
| $p_{sc}^A$ | Proportion of subclinical cases                              | 0.27 for $A$ in [0,1]<br>0.48 for $A$ in [2,6]<br>0.57 for $A$ in [7,19]<br>0.43 for $A$ in [20,29]<br>0.38 for $A$ in [30,39]<br>0.30 for $A$ in [40,49]<br>0.24 for $A$ in [50,59]<br>0.15 for $A$ in [60,69]<br>0.11 for $A$ in [70,79]<br>0.12 for $A$ in [80,89]<br>0.26 for $A$ in 90+ | (13)              |

849

850

851

852

853

854

## 855 **Supplementary Material of**

# 856 **Anatomy of digital contact tracing: role of age,** 857 **transmission setting, adoption and case detection**

858

859

## 860 **Additional methods**

### 861 **Algorithms for the generation of the synthetic population**

862 The generation of the synthetic population is a stochastic process resulting in a contact  
863 network being slightly different each time it is generated. Thanks to this mechanism, we can  
864 account for some of the uncertainty concerning the input data. It also allows for population  
865 scaling to reduce the population by respecting its composition and spatial distribution, thus  
866 increasing computational efficiency. Specifically, the scaling decreases the number of  
867 individuals in municipalities and the fluxes of commuters between them, but it does not  
868 impact the number of municipalities nor the number of schools and workplaces. The smaller  
869 population has a smaller number of households, but it maintains the statistics regarding  
870 family size and age structure given by the INSEE data.

### 871 **Households**

872 Census data on age structure and household type and size are used to randomly assign age  
873 and locate individuals in households. Five different types of household are considered: single  
874 person, single with children, couple without children, couple with children, other household  
875 groups; some of the household types may also contain an additional adult member (usually  
876 an elderly person or a relative: if the number of additional adults is greater than one, the  
877 household falls in the "other" category). For each municipality  $m$  with population size  $pop_m$ ,  
878 we generate new households until the size of the virtual population of the municipality  $vir_m$

879 reaches the real size of population  $pop_m$ . For each household, we determine its type, its size  
880 and the presence of an additional member (if the household type is not single-person or  
881 couple without children, and in the case of a household with children if the size is greater  
882 than the number of adults plus one): then, according to the role of each individual (adult,  
883 child or other) we randomly extract his/her age, with some additional conditions:

884 C1: the age of any child is between 15 and 45 years less than that of the youngest parent;

885 C2: spouses' ages differ by no more than 15 years.

886 The detailed procedure is summarized in Algorithm 1.

887 Algorithm S1: Creation of households in municipalities

**for each municipality do**

$pop_m \leftarrow$  number of individuals in  $m$ ;

$vir_m \leftarrow 0$ ;

**while**  $vir_m < pop_m$  **do**

determine household type  $t \sim M(p_T)$ , where  $M(p_T)$  is a multinomial distribution with probabilities  $p_T$  given in the first column of Table 1;

determine age class of household head  $c \sim M(p_C(t))$ , where  $M(p_C(t))$  is a multinomial distribution with probabilities  $p_C(t)$  given in Table 2;

determine if the household contains an additional member according to probabilities  $p_E(t)$  given in the second column of Table 1;

determine age of household head  $a \sim M(p_A(c))$ , where  $M(p_A(c))$  is the multinomial distribution of the French age structure in the interval  $c$ ;

**for each other member of household do**

determine the role  $r$  of the member (other adult in couple, children of couple; children of single, other);

determine age class  $c_m \sim M(p_{C_m}(r))$ , where  $M(p_{C_m}(r))$  is a multinomial distribution with probabilities  $p_{C_m}(r)$  given in Table 4;

determine the exact age  $a_m \sim M(p_A(c_m))$  with the additional constraints C1 and C2;

```

    end
    virm ← virm + s
end

```

End

888

889 Table S1 For each household type, the first column shows its frequency; the second column the probability that  
 890 the household type contains an additional member; the third column the frequency of individuals in each  
 891 household type

| Type of household       | Frequency | Fr. of add. member | Fr. of individuals |
|-------------------------|-----------|--------------------|--------------------|
| Single without children | 0.338     | 0.0                | 0.149              |
| Couple without children | 0.268     | 0.0204             | 0.243              |
| Couple with children    | 0.277     | 0.0096             | 0.475              |
| Single with children    | 0.09      | 0.0123             | 0.106              |
| Other                   | 0.027     | 0.0                | 0.027              |

892

893 Table S2 For each household type, the frequency of the age class of the household head

| Type of household       | 0 - 14 | 15 - 19 | 20 - 24 | 25 - 39 | 40 - 54 | 55 - 64 | 65 - 79 | 80 - 100 |
|-------------------------|--------|---------|---------|---------|---------|---------|---------|----------|
| Single without children | 0.0    | 0.019   | 0.075   | 0.191   | 0.186   | 0.162   | 0.212   | 0.155    |

|                         |     |       |       |       |       |       |       |       |
|-------------------------|-----|-------|-------|-------|-------|-------|-------|-------|
| Couple without children | 0.0 | 0.029 | 0.132 | 0.263 | 0.264 | 0.133 | 0.094 | 0.085 |
| Couple with children    | 0.0 | 0.002 | 0.023 | 0.271 | 0.47  | 0.116 | 0.073 | 0.045 |
| Single with children    | 0.0 | 0.001 | 0.021 | 0.251 | 0.313 | 0.197 | 0.17  | 0.047 |
| Other                   | 0.0 | 0.008 | 0.042 | 0.233 | 0.283 | 0.176 | 0.173 | 0.085 |

894

895 Table S3 Probability distributions of the size of the household (except singles and couples without children,  
 896 having size 1 and 2, respectively) for each age class of the household head. Rows are the age class of the  
 897 household head, while columns are the size of the household

| Age class | size: 1 | size: 2 | size: 3 | size: 4 | size: 5 | size: 6 |
|-----------|---------|---------|---------|---------|---------|---------|
| 0 - 19    | 0.0     | 0.3386  | 0.4432  | 0.1169  | 0.0479  | 0.0534  |
| 20 - 24   | 0.0     | 0.1247  | 0.6325  | 0.1732  | 0.044   | 0.0256  |
| 25 - 29   | 0.0     | 0.169   | 0.5217  | 0.2291  | 0.0585  | 0.0217  |
| 30 - 34   | 0.0     | 0.1327  | 0.3919  | 0.343   | 0.1008  | 0.0316  |
| 35 - 39   | 0.0     | 0.106   | 0.273   | 0.411   | 0.1594  | 0.0506  |
| 40 - 44   | 0.0     | 0.1087  | 0.2546  | 0.3984  | 0.1767  | 0.0616  |
| 45 - 49   | 0.0     | 0.1123  | 0.3323  | 0.3568  | 0.1434  | 0.0552  |
| 50 - 54   | 0.0     | 0.1021  | 0.4621  | 0.2887  | 0.1005  | 0.0466  |
| 55 - 59   | 0.0     | 0.0997  | 0.5513  | 0.2269  | 0.0763  | 0.0458  |
| 60 - 64   | 0.0     | 0.1119  | 0.5888  | 0.1884  | 0.0657  | 0.0452  |
| 65 - 69   | 0.0     | 0.2312  | 0.5307  | 0.1469  | 0.0526  | 0.0386  |
| 70 - 74   | 0.0     | 0.3896  | 0.4509  | 0.1026  | 0.0349  | 0.022   |
| 75 - 79   | 0.0     | 0.5679  | 0.3392  | 0.0643  | 0.0183  | 0.0103  |
| 80 - 100  | 0.0     | 0.7572  | 0.1956  | 0.0335  | 0.0087  | 0.005   |

898

899 Table S4 Probability of age class of individuals depending on his role in the household, excluding the household  
 900 head

| Age class | Child of couple | Child of a single | Adult of couple with children | Adult of couple without children | Other  |
|-----------|-----------------|-------------------|-------------------------------|----------------------------------|--------|
| 0 - 4     | 0.2384          | 0.1288            | 0.0                           | 0.0                              | 0.0161 |
| 5 - 9     | 0.2264          | 0.181             | 0.0                           | 0.0                              | 0.0176 |
| 10 - 14   | 0.212           | 0.2125            | 0.0                           | 0.0                              | 0.0226 |
| 15 - 19   | 0.1777          | 0.2131            | 0.0035                        | 0.0008                           | 0.0825 |
| 20 - 24   | 0.0886          | 0.1144            | 0.0445                        | 0.0164                           | 0.1587 |
| 25 - 29   | 0.0305          | 0.0448            | 0.071                         | 0.0718                           | 0.1051 |
| 30 - 34   | 0.0105          | 0.0204            | 0.0414                        | 0.1392                           | 0.066  |
| 35 - 39   | 0.0064          | 0.0182            | 0.0244                        | 0.1848                           | 0.0576 |
| 40 - 44   | 0.0045          | 0.0181            | 0.0224                        | 0.1873                           | 0.0577 |
| 45 - 49   | 0.0028          | 0.0172            | 0.0434                        | 0.1642                           | 0.0578 |
| 50 - 54   | 0.0014          | 0.0139            | 0.0902                        | 0.111                            | 0.057  |
| 55 - 59   | 0.0006          | 0.0101            | 0.1379                        | 0.0621                           | 0.057  |
| 60 - 64   | 0.0002          | 0.0053            | 0.1537                        | 0.0306                           | 0.0506 |
| 65 - 69   | 0.0             | 0.0016            | 0.1126                        | 0.0135                           | 0.0364 |
| 70 - 74   | 0.0             | 0.0005            | 0.0993                        | 0.0086                           | 0.0356 |
| 75 - 79   | 0.0             | 0.0001            | 0.0812                        | 0.0056                           | 0.0382 |
| 80 - 100  | 0.0             | 0.0               | 0.0745                        | 0.0041                           | 0.0835 |

901

902 **Employment**

903 School and industry census data are used to randomly assign an employment category to  
 904 each individual on the basis of age: the probabilities are reported in Table S5. The table



916

917 **Face-to-face contact network**

918 **Acquaintance network**

919 For each place,  $i$  – a workplace ( $W$  layer), a school ( $S$  layer) and a municipality ( $C$  and  $T$   
920 layers) – we build an Erdős–Rényi network, with average degree  $\chi_i$ . The latter is a  
921 stochastic variable and depends on place layer,  $s_i$ , and size,  $n_i$ . We draw it from a gamma  
922 distribution with average  $\overline{\chi(s, n)}$  and coefficient of variation  $CV$ .

923 We expect that when the size of a place is small each individual enters in contact with  
924 everybody. As the size increases the number of contacts saturates. We model this by  
925 assuming  $\overline{\chi(s, n)} = \frac{w_s (n-1)}{w_s + (n-1)}$ . The function approaches  $(n - 1)$  for small  $n$  and saturates to  $w_s$   
926 as  $n$  increases (Figure S1).

927 For each setting the parameter  $w_s$  is tuned to reproduce the overall proportion of contacts  
928 occurring in the layer.  $CV$  rules the level of heterogeneity among places of the same kind and  
929 size. For simplicity we assume it to be the same for all settings. Additional details on the  
930 parametrization are provided below.

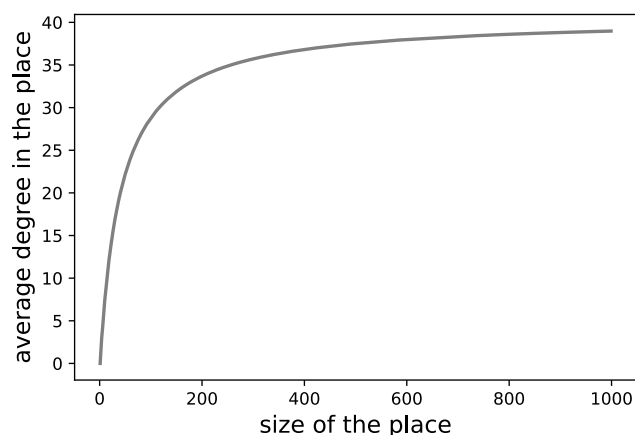

931



932 Figure S1 Average degree of the acquaintance network  $\overline{\chi(s,n)}$  as a function of the size of the place. As the size  
933 goes to infinity the degree saturates to  $w_s$  that depends on the setting. Here we show as an example the curve for  
934 the workplace ( $w_W = 41.8$ ). The other parameters estimated are  $w_S = 18,23$ ,  $w_C = 4,3$ ,  $w_T = 20,9$ .

### 935 **Daily contact network**

936 Once the acquaintance network is built a daily activation rate  $x$  is assigned to each link  
937 according to a cumulative distribution  $F_s(x)$  that depends on the layer  $s$ . We model  $F_s(x)$  with  
938 a sigmoid function with two parameters,  $A_s$  and  $B_s$ . For simplicity we assume  $F_s(x)$  to be the  
939 same for  $s = W, S, C$ , while we allow it to be different in households (where contacts are more  
940 frequent) and in transports (where contacts are sporadic). On average, a fraction  $\langle x \rangle_s$  of the  
941 links of the acquaintance network is active each day. By indicating with  $K_s$  and  $k_s$  the  
942 average degree of a layer in the acquaintance and daily networks, respectively, we have

$$943 \quad \langle x \rangle_s = \frac{k_s}{K_s}.$$

### 944 **Parametrization**

945 We tuned parameters  $w_s$ ,  $A_s$ ,  $B_s$  and  $CV$  to reproduce the contact statistics in (33), namely:

- 946 • the average daily number of contacts is 10;
- 947 • the contact distribution is skewed with mode 3;
- 948 • being  $k_s$  the average daily number of contacts in setting  $s$  and  $r_s = \frac{k_s}{k_H}$ , the survey reports  
949  $r_W = 3.17$ ,  $r_S = 1.55$ ,  $r_C = 1.86$ , and  $r_T = 0.23$ .
- 950 • 35% of the registered contacts were with people met every day, while the rest with  
951 people met less frequently.

952 Specifically, these data provide the following constraints:

- 953 • Combining point 1) and 2) above we get  $k_H(1 + r_W + r_S + r_C) = 10$ , meaning  $k_H = 1.28$ .  
954 The household statistics used for our synthetic population reconstruction yields  $K_H =$   
955  $1.97$ . This implies  $\langle x \rangle_H = 0.65$ .

956 • We assume that the daily contact network has 35% of links with activity rate  $>0.95$ . In  
957 order to do so we must account for the fact that being  $f_s(x)$  the distribution of activation  
958 rate values assigned to links of the acquaintance network (i.e. the probability density  
959 function associated to  $F_s(x)$ ), the distribution of links sampled in the daily network is  
960 biased toward higher rates, i.e. it is given by  $\frac{x}{\langle x \rangle} f_s(x)$ .

961 In addition to these, we assume uncommon but still possible to meet more than once people  
962 in transports within a time frame of one or few months. Thus, we assume an activation rate  
963 for links in the transport layer as high as a few percent or lower. Based on these constraints  
964 we design the frequency distribution as in Figure S2.

965 Once  $F_s(x)$  is parametrized we tune the parameters  $w_s$  of the acquaintance network to  
966 reproduce the proportion  $r_s$  of daily contacts in different settings. We then fix  $CV = 0.2$  to  
967 reproduce the mode of the distribution. The main properties of the network (contact  
968 distribution, link activation frequency, and age contact matrix) are shown in Figure 1 of the  
969 main paper. Other features are summaries in Table S1.

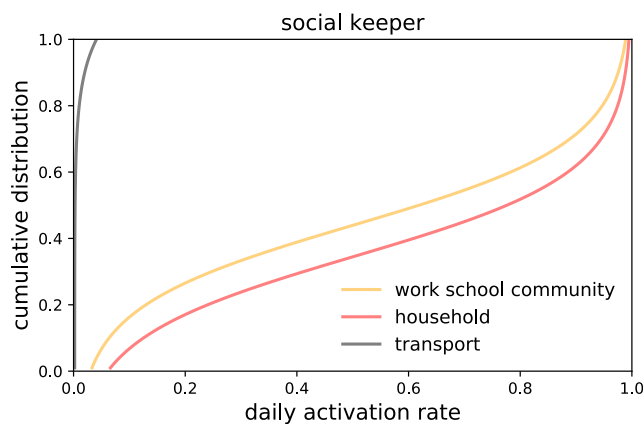

970

971 Figure S2 Cumulative distribution of the daily activation rate of contacts. We model it with the function  $F(x) =$   
972  $A \tanh^{-1}(1 - 2x) + B$ . Parameters are the following:  $A = 0.25$  for all settings;  $B_H = 0.65, B_T = -0.40, B_S = 0.56$   
973 ( $s = S, W, C$ ).

974 Table S6 Main network features

| Parameter                            | Description                                                                    | Value       |
|--------------------------------------|--------------------------------------------------------------------------------|-------------|
| $\langle x \rangle_{s, s = S, W, C}$ | Average activation rate of contacts for the school, workplace, community layer | 0.56        |
| $\langle x \rangle_H$                | Average activation rate of contacts for the household layer                    | 0.65        |
| $\langle x \rangle_T$                | Average frequency of contacts for the transport layer                          | 0.007       |
| $k_H (K_H)$                          | Average degree of the daily network (acquaintance network) in a household      | 1.79 (2.31) |
| $k_W (K_W)$                          | Average degree of the daily network (acquaintance network) in a workplace      | 12.9 (22)   |
| $k_S (K_S)$                          | Average degree of the daily network (acquaintance network) in a school         | 7.9 (14)    |
| $k_C (K_C)$                          | Average degree of the daily network (acquaintance network) in a community      | 2.6 (4.3)   |
| $k_T (K_T)$                          | Average degree of the daily network (acquaintance network) in transport        | 1.1 (21)    |

975

## 976 **Details of the numerical simulations**

977 Simulations are discrete-time and stochastic. At each time step, corresponding to one day,  
 978 three processes occur: (i) the contact network is sampled according to the activation rate of  
 979 each link; (ii) for each node, the infectious status is updated; and (iii) cases and contacts are  
 980 isolated, or get out from isolation.

981 The transmission process is modelled through the links of the multi-layer network as follows.

982 At each time step, a susceptible node  $i$  gets infected with the following probability

$$983 \Lambda_i = 1 - \left( \prod_s \prod_{j \in v_s} (1 - \sigma_{A,i} \beta \beta_{l,j} \omega_s \delta_j) \right),$$

984 where  $j$  is a node belonging to the neighborhood  $v_s$  of  $i$  on layer  $s$ , and  $\delta_j$  is 1 if  $j$  belongs to

985 any infectious stage ( $I_{p,sc}, I_{p,c}, I_{sc}, I_c$ ) and 0 otherwise. Links of layer  $s$  have weight  $\omega_s$ , that

986 represent the average level of risk associated to contacts occurring in the setting  $s$ . We

987 assume that individuals in the  $I_c$  state stay at home due to illness and can therefore transmit

988 the disease only through the links of the household layer.

989 Simulations are run on the synthetic municipality of Strasbourg. The population is reduced by

990 a factor 3 to shorten simulation time to feasible levels, yielding a population of 92,423

991 individuals.

992 A single-run simulation is executed with no modelled intervention, until the desired immunity

993 level is reached. This guarantees that immune individuals are realistically clustered in space.

994 Then the simulations of the epidemic with contact tracing are started, considering 15

995 individuals initially infected randomly assigned in the population.

996 Quantities shown in Figures 2, 3, 4, and 5 of the main paper are computed by averaging

997 results over different stochastic realizations. We run 100 stochastic simulations. Increased

998 statistics (300 runs) was necessary to accurately compare the relative reduction in incidence

999 obtained with low app adoption levels – i.e. household isolation only, app adoption 6% and

1000 app adoption 19%.

1001 We vary COVID-19 transmission potential by tuning the daily transmission rate per contact  $\beta$ .

1002 The reproductive number  $R$  is computed numerically as the average number of infections

1003 each infected individual generates throughout its infectious period. To do so, population

1004 immunity at the beginning of the simulation is set to 0 and  $R$  is computed considering the

1005 infections generated by individuals who get infected the first two time-steps of the simulations  
1006 to guarantee that the whole population is susceptible. We find that  $\beta = 0.1, 0.125, 0.15,$   
1007  $\dots, 0.25$  corresponds to the following  $R$  values: 1.47 95% CI [0.0, 4.86], 1.75 95% CI [0.0,  
1008 5.78], 2.05 95% CI [0.0, 5.31], 2.25 95% CI [0.0, 5.31], 2.61 95% CI [0.0, 6.13], 2.95 95% CI  
1009 [0.06, 7.29], 3.09 95% CI [0.68, 8.11]. We also computed numerically the generation time  
1010 from the infector-infected pairs.

1011

## 1012 Additional results

### 1013 Uncontrolled epidemic

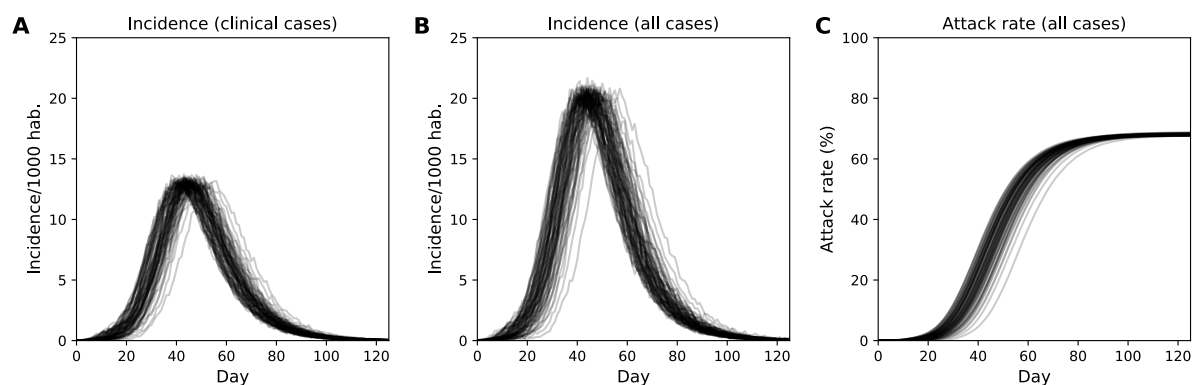

1014

1015 Figure S3 Epidemic in an uncontrolled scenario. **A** Incidence of clinical cases. **B** Incidence of all cases. **C** Attack  
1016 rate. The bundle of curves shows 70 stochastic realizations. The epidemic is obtained with transmission rate  $\beta =$   
1017 0.25 corresponding to  $R_0 = 3.1$ .

### 1018 App adoption variable by age

1019 The model accounted for age-varying smartphone penetration. However, we assumed that  
1020 the probability of downloading the app, provided an individual owns a smartphone, is uniform  
1021 and independent on age – uniform app adoption scenario,  $U$ . This hypothesis is simplified.  
1022 Indeed, elderly people may be less inclined to use the app even when they own a  
1023 smartphone. We also tested the extreme case scenario in which no individual in the 70+ age  
1024 cohort adopts the app – non-uniform app adoption scenario,  $NU$ . We consider a 32% app

1025 coverage over the whole population, and we compared  $U$  and  $NU$  scenarios, assuming the  
1026 same number of apps are downloaded in the two cases. Figure S4 shows the attack rate  
1027 relative reduction  $ARR = \frac{AR_U^A - AR_{NU}^A}{AR_U^A}$  by age group, where  $AR_{sce}^A$  is the attack rate of the  
1028 epidemic for the age group,  $A$ , and the scenario,  $sce = U, NU$ . We found that  $ARR$  is close to  
1029 zero, meaning that  $AR_{NU}^A \simeq AR_U^A$ , for all age groups (Figure S4). This means that distributing  
1030 the app only to individuals younger than 70 years would not reduce the protection in the 70+  
1031 age group.

1032

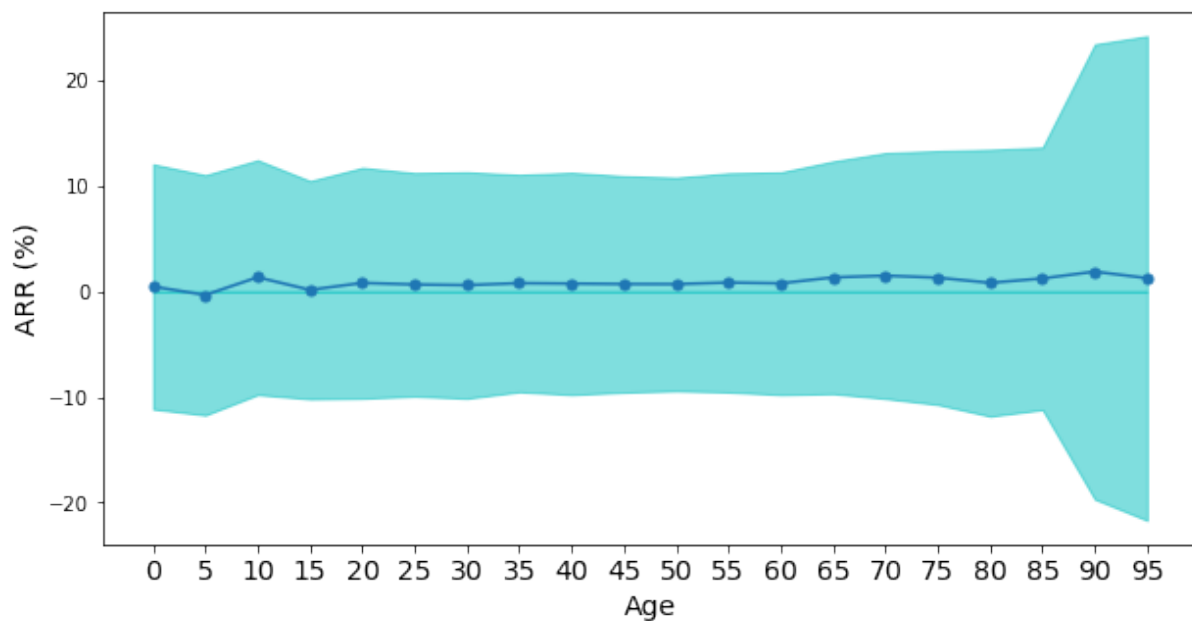

1033

1034 Figure S4 Comparison between the  $U$  and the  $NU$  contact tracing scenario. Here  $R = 2.6$ , Immunity is 10%,  
1035 detection probability is 50% and app penetration is 32%. The line shows the average attack rate relative reduction  
1036 and the shaded area is standard deviation.

1037

1038
